# 1 Peopling of Tibet Plateau and multiple waves of admixture of Tibetans 2 inferred from both modern and ancient genome-wide data

3  
4 Mengge Wang<sup>1,\*</sup>, Xing Zou<sup>1,\*</sup>, Hui-Yuan Ye<sup>2,\*</sup>, Zheng Wang<sup>1</sup>, Yan Liu<sup>3</sup>, Jing Liu<sup>1</sup>, Fei Wang<sup>1</sup>, Hongbin  
5 Yao<sup>4</sup>, Pengyu Chen<sup>5</sup>, Ruiyang Tao<sup>1</sup>, Shouyu Wang<sup>1</sup>, Lan-Hai Wei<sup>6</sup>, Renkuan Tang<sup>7,#</sup>, Chuan-Chao  
6 Wang<sup>6,#</sup>, Guanglin He<sup>1,6,#</sup>

7  
8 <sup>1</sup>Institute of Forensic Medicine, West China School of Basic Science and Forensic Medicine, Sichuan  
9 University, Chengdu, China

10 <sup>2</sup>School of Humanities, Nanyang Technological University, Nanyang, 639798, Singapore

11 <sup>3</sup>College of Basic Medicine, Chuanbei Medical University

12 <sup>4</sup> Belt and Road Research Center for Forensic Molecular Anthropology, Key Laboratory of Evidence  
13 Science of Gansu Province, Gansu University of Political Science and Law, Lanzhou 730070, China

14 <sup>5</sup>Center of Forensic Expertise, Affiliated hospital of Zunyi Medical University, Zunyi, Guizhou, China

15 <sup>6</sup>Department of Anthropology and Ethnology, Institute of Anthropology, National Institute for Data  
16 Science in Health and Medicine, and School of Life Sciences, Xiamen University, Xiamen, China

17 <sup>7</sup>Department of Forensic Medicine, College of Basic Medicine, Chongqing Medical University,  
18 Chongqing, China

19  
20 \*These authors contributed equally to this work and should be considered co-first authors.

21  
22 #Corresponding author

23 Renkuan Tang

24 Department of Forensic Medicine, College of Basic Medicine, Chongqing Medical University,  
25 Chongqing, China

26 Email: [renktang2012@163.com](mailto:renktang2012@163.com)

27 Chuan-Chao Wang

28 Affiliation: Department of Anthropology and Ethnology, Institute of Anthropology, National Institute for  
29 Data Science in Health and Medicine, Xiamen University,  
30 Xiamen, China.

31 E-mail: [wang@xmu.edu.cn](mailto:wang@xmu.edu.cn)

32 Guanglin He

33 Affiliation: Department of Anthropology and Ethnology, Institute of Anthropology, National Institute for  
34 Data Science in Health and Medicine, Xiamen University,  
35 Xiamen, China.

36 E-mail: [Guanglinhescu@163.com](mailto:Guanglinhescu@163.com)

## 37 38 39 **Abstract**

40 Archeologically attested human occupation on the Tibet Plateau (TP) can be traced back to 160 thousand  
41 years ago (kya, Xiahe) via archaic people and 30~40 kya via anatomically modern human in Nwya Devu.  
42 However, the past human movements and peopling of the TP keep in its infancy in the modern/ancient  
43 DNA studies. Here, we performed the first modern/ancient genomic meta-analysis among 3,017  
44 Paleolithic to present-day eastern Eurasian genomes (2,444 modern individuals from 183 populations  
45 (including 98 Ü-Tsang/Ando/Kham Tibetans) and 573 ancients (including 161 Chinese ancients first  
46 meta-analyzed here)). Closer genetic connection between ancient-modern highland Tibetans and lowland  
47 island/coastal Neolithic northern East Asians was identified, reflecting the main ancestry of high-altitude  
48 Tibeto-Burman speakers originated from the ancestors of Houli/Yangshao/Longshan ancients in the  
49 middle and lower Yellow River basin, consistent with the common North-China origin of Sino-Tibetan  
50 language and dispersal pattern of millet farmers. Although the shared common northern East Asian  
51 lineage between Tibetans and lowland East Asians, we still identified genetic differentiation between  
52 Highlanders and lowland northern East Asians, the former harboring more deeply diverged  
53 Hoabinhian/Onge ancestry and the latter possessing more modern Neolithic southern East Asian and  
54 Siberian ancestry, which suggested the co-existence of Paleolithic and Neolithic ancestries in modern  
55 and Neolithic East Asian Highlanders. Tibetans from Ü-Tsang/Ando/Kham Tibetan regions showed  
56 strong population stratifications consistent with their cultural backgrounds and geographic terrains  
57 (showed as barriers for human movements): stronger Chokhopani affinity in Ü-Tsang Tibetans, more  
58 western Eurasian ancestry in Ando and greater Neolithic southern East Asian ancestry in Kham Tibetan.  
59 Modern combined ancient genomes documented multiple waves of human migrations in TP past: the

60 first layer of local Hunter-Gatherer mixed with Qijia Farmer arose the Chokhopani-associated Proto-  
61 Tibetan-Burman, admixture with the additional genetic materials from the western Eurasian steppe,  
62 Yellow River and Yangtze River respectively gave rise to modern Ando, Ü-Tsang and Kham Tibetans.  
63 **Keywords:** Ancient genomes, Tibetan Plateau, Sino-Tibetan, Genetic history, East Asian

## 64 65 **Introduction**

66 The Tibet Plateau (TP), widely known as the Third Pole of the world, forms the high-altitude core of  
67 Asia with an average elevation of more than 4,000 meters above sea level (masl) and represents one of  
68 the most demanding environments for human settlement due to perennial low temperatures, extreme  
69 aridity, and severe hypoxia. However, archeological and genetic studies have indicated that archaic  
70 hominins occupied the TP had well adapted to the high-altitude hypoxic environment long before the  
71 arrival of modern *Homo sapiens* and present-day Tibetan Highlanders have adapted uniquely to extreme  
72 high-altitude conditions since the initial colonization of the TP(Qi, et al. 2013; Jeong, et al. 2016;  
73 Gneccchi-Ruscone, et al. 2018; Chen, Welker, et al. 2019). Besides, recent linguistic evidence suggested  
74 that Tibeto-Burman populations diverged from Han Chinese with an average coalescence age of  
75 approximately 5.9 thousand years ago (kya). At present, over seven million indigenous Tibetans (2016  
76 census) have settled in the Plateau and are successfully adapted to the high-altitude hypoxic environment.  
77 Genomic evidence supported that multiple variants may jointly deliver the fitness of the modern Tibetans  
78 on the TP, and Denisovan introgression into modern Tibetans and surrounding populations including  
79 positively selected haplotypes of *HIF-1 $\alpha$  prolyl hydroxylase1 (EGLN1)* and *Endothelial PAS domain*  
80 *protein 1 (EPAS1)* is significantly associated with the high-altitude adaptation to hypoxia(Simonson, et  
81 al. 2010; Xu, et al. 2011; Xiang, et al. 2013; Huerta-Sanchez, et al. 2014; Lu, et al. 2016; Gneccchi-  
82 Ruscone, et al. 2018; Chen, Welker, et al. 2019; Deng, et al. 2019). Compared to other parts of East  
83 Asia(Reich 2018; Ning, et al. 2019; Jeong, et al. 2020; Ning, et al. 2020; Wang, Yeh, et al. 2020; Yang,  
84 et al. 2020), the greatest problem facing researchers is the lack of excavated archaeological sites on the  
85 TP, which means that certain types of critical data, such as zooarchaeological and archaeobotanical data  
86 for reconstructing the subsistence strategy, ancient DNA (aDNA) for dissecting the genomic correlation  
87 between ancient individuals and modern Tibetan-like Highlanders, are in short supply.  
88

89 To date, whence and how the early human colonizers conquered the TP and who modern Tibetans  
90 descended from are two key questions that remain to be solved, however, archaeological,  
91 paleoanthropological and genetic researches on the peopling of the TP and demographic history of  
92 Tibetan Highlanders are still in a developmental stage. As revealed by archaeological evidence,  
93 handprints and footprints of *Homo sapiens* found in the southern TP (Quesang site) at 4,200 masl  
94 suggested that the TP retains traces of an intermittent human presence from at least 20 kya(Zhang and Li  
95 2002), but some scholars supporting at the early Holocene(Meyer, et al. 2017). The Nwya Devu site,  
96 located nearly 4,600 masl in central Tibet, could be dated to at least 30 kya, which deepens considerably  
97 the history of the peopling of the TP and the antiquity of human high-altitude adaptations(Zhang, et al.  
98 2018). The palaeoproteomic analysis of a Xiahe Denisovan mandible indicated that the prehistoric  
99 colonization of archaic hominins on the TP could be traced back to the Middle Pleistocene epoch (around  
100 160 kya)(Chen, Welker, et al. 2019). Additionally, genomic evidence strongly suggested that modern  
101 humans did exist on the TP before the Last Glacial Maximum (LGM), and the existence of genetic relics  
102 of the Upper Paleolithic inhabitants in modern Tibetans indicated some genetic continuity between the  
103 initial Paleolithic settlers and modern Tibetan Highlanders(Zhao, et al. 2009; Qin, et al. 2010; Qi, et al.  
104 2013; Li, et al. 2015; Lu, et al. 2016). The archaeogenetic investigation of prehistoric Himalayan  
105 populations provided supporting evidence for the high-elevation East Asian origin of the first inhabitants  
106 of the Himalayas, indirectly indicating the pre-Neolithic human activities on the TP(Jeong, et al. 2016).  
107

108 In contrast to the Late Pleistocene hunter-gatherer colonization, the timing and dynamics of the  
109 permanent human occupation of the TP have provoked much debate(Aldenderfer 2011; Qi, et al. 2013;  
110 Chen, et al. 2015; d'Alpoim Guedes 2015; Lu 2016; Rhode 2016; Hu, et al. 2019; Li, Tian, et al. 2019a;  
111 Ren, et al. 2020). Archaeological and genomic findings revealed that the permanent settlement of the TP  
112 was a relatively recent occurrence that coincided with the establishment of farming and pastoralism on  
113 the Plateau(Aldenderfer 2011; Qi, et al. 2013; Chen, et al. 2015; Lu 2016; Li, Tian, et al. 2019a). Chen  
114 et al. reported archaeobotanical and zooarchaeological data from 53 archaeological sites in the  
115 northeastern TP (NETP) and illustrated that the novel agropastoral subsistence strategy facilitated year-  
116 round living on the TP after 3.6 kya(Chen, et al. 2015). The first comprehensive and in-depth genomic  
117 investigation of the Tibet sheep revealed a stepwise pattern of permanent human occupation on the TP  
118 through the Tang-Bo Ancient Road (~3,100 years ago, from northern China to the NETP; and ~1,300  
119 years ago, from the NETP to southwestern areas of the TP)(Hu, et al. 2019). However, it remains

120 unknown who brought the cold-tolerant barley agriculture and livestock to the TP, and how indigenous  
121 foragers interacted with incoming farmers remains unclear. The archaeological observations  
122 demonstrated that incoming farmer groups did not replace the local foragers, and the two populations co-  
123 existed for extended periods(Gao, et al. 2020; Ren, et al. 2020). The mitochondrial evidence and  
124 radiocarbon dates of the cereal remains revealed that millet farmers adopted and brought barley  
125 agriculture to the TP around 3.6–3.3 kya, and contemporary Tibetans could trace their ancestry back to  
126 the Neolithic millet farmers(Li, Tian, et al. 2019a). Xu et al. conducted a series of typical population  
127 genomic studies focused on the demographic history of modern Tibetans and other high-altitude adaptive  
128 Highlanders and concluded that Tibetans arose from a mixture of multiple ancestral gene pools and  
129 Paleolithic and Neolithic ancestries co-existed in the Tibetan gene pool(Lu, et al. 2016). Moreover, the  
130 studies of genetic variations of modern Tibetan groups have also been performed based on forensically  
131 available markers(He, Wang, Su, et al. 2018; He, Wang, Zou, et al. 2018; Wang, He, et al. 2018; Zou, et  
132 al. 2018; Li, Ye, et al. 2019; Wang, Du, et al. 2020; Wang, Wang, et al. 2020; Zou, et al. 2020), however,  
133 the low-resolution of these markers hinders the comprehensive understanding of prehistoric human  
134 activities on the TP and impedes the dissection of ancestral components of Tibetans. Collectively,  
135 previous studies pave the way towards a better understanding of Middle Pleistocene arrival, Paleolithic  
136 colonization, and Neolithic permanent settlement on the TP. However, most of the previously  
137 archeological investigations have focused primarily on NETP (< 4000 masl), and the lack of discussion  
138 of ancient samples from the TP and the uncomprehensive analysis of ancient individuals from East Asia  
139 hindered our ability to connect geographically and temporally dispersed ancient East Asians and modern  
140 Tibetans. Thus, we comprehensively meta-analyzed the genetic variations of modern and ancient  
141 Highlanders from TP and surrounding lowland eastern Eurasians and explored the phylogenetic  
142 relationship between East Highlander and reference worldwide populations. By analyzing genome-wide  
143 data of Neolithic to Historic individuals from East Asia and modern Tibetans, we shed light on the genetic  
144 transition, turnover or continuity, ancestral composition and demographic history of Tibetan Highlanders.

## 145 146 **Results**

### 147 **Genome-wide data of both modern and ancient Tibetans showed their closed genetic affinity with** 148 **northern East Asians**

149 To explore the genomic history of modern Tibetans and elucidate the peopling of Qinghai-Tibet Plateau,  
150 we used the genome-wide data from 98 modern Tibetans (**Figure 1A**) collecting from eleven  
151 geographically different regions and cultural backgrounds from Tibet Autonomous Region (five),  
152 Qinghai (two), Gansu (one), Sichuan (two) and Yunnan (One), which were used to reconstruct the genetic  
153 background of modern East Asians in our recent ancient genome research of the deep genomic history  
154 of East Asia(Wang, Yeh, et al. 2020). Besides, we merged our data with other modern and ancient East  
155 Asians(Patterson, et al. 2012; Lipson, Cheronet, et al. 2018; Jeong, et al. 2019; Liu, et al. 2020), in which  
156 modern samples from Altai-speaking (also referred as Mongolic, Tungusic, and Turkic language families  
157 by other scholars), Sino-Tibetan (Sinitic and Tibeto-Burman), Hmong-Mien, Austronesian, Austroasiatic,  
158 and Tai-Kadai language families, and ancient populations included eight individuals from Nepal(Jeong,  
159 et al. 2016) (Chokhopani, Samdzong, and Mebrak cultures), eighty-four samples from Yellow  
160 River(Ning, et al. 2020; Wang, Yeh, et al. 2020; Yang, et al. 2020), Amur River and West Liao River in  
161 the coastal and inland northern East Asia (including Houli, Yangshao, Longshan, Qijia, Hongshan, Yumin,  
162 and other cultures), fifty-eight individuals(Ning, et al. 2020; Wang, Yeh, et al. 2020; Yang, et al. 2020)  
163 belonged to Tanshishan and other cultures in the coastal southeast China, islands of Taiwan strait and  
164 Taiwan. We also included the Neolithic to Bronze Age or Iron Age populations from Southwest  
165 Asia(Lipson, Cheronet, et al. 2018; McColl, et al. 2018) and Siberia(Allentoft, et al. 2015; Mathieson, et  
166 al. 2015; Damgaard, et al. 2018; de Barros Damgaard, et al. 2018; Sikora, et al. 2019) in some of the  
167 following comprehensive population genetic analyses. All Tibetans and Neolithic to historic East Asians  
168 were grouped in the East Asian genetic cline along the second component in the Eurasian PCA (Data not  
169 shown here). Focused on the genetic variations of East Asian, we constructed East Asian PCA based on  
170 genetic variations from 106 modern populations from East Asia and the island and mainland Southeast  
171 Asia (**Figure 1B**). We found that modern East Asians grouped into four genetic clines or clusters  
172 (Mongolic/Tungusic genetic clines consisting of populations from northeast Asia; South China/Southeast  
173 Asian genetic cluster comprising of Austronesian, Austroasiatic, Tai-Kadai, and Hmong-Mien speakers;  
174 Sinitic-related north-to-south genetic cline and Tibeto-Burman cluster), which were consistent with the  
175 linguistic divisions and geographical regions. Tibetan populations were grouped together and showed a  
176 relatively close relationship with some of Mongolic and Tungusic speakers in North China and northern  
177 Han Chinese and other lowland Tibeto-Burman speakers. Focused on the population substructures of  
178 Tibetan populations, we further observed three different sub-clusters which also were consistent with the  
179 geographical position of sampling places. Here, we referred to as to high-altitude adaptive Tibet Tibetan

180 or Ü-Tsang Tibetan cluster (Lhasa, Nagqu, Shannan and Shigatse), Gan-Qing or Ando Tibetan genetic  
 181 cluster in northeastern TP (Xunhua, Gangcha, and Gannan) and lowland southeast genetic cluster or  
 182 Kham Tibetans (Chamdo, Xinlong, Yajiang, and Yunnan).  
 183

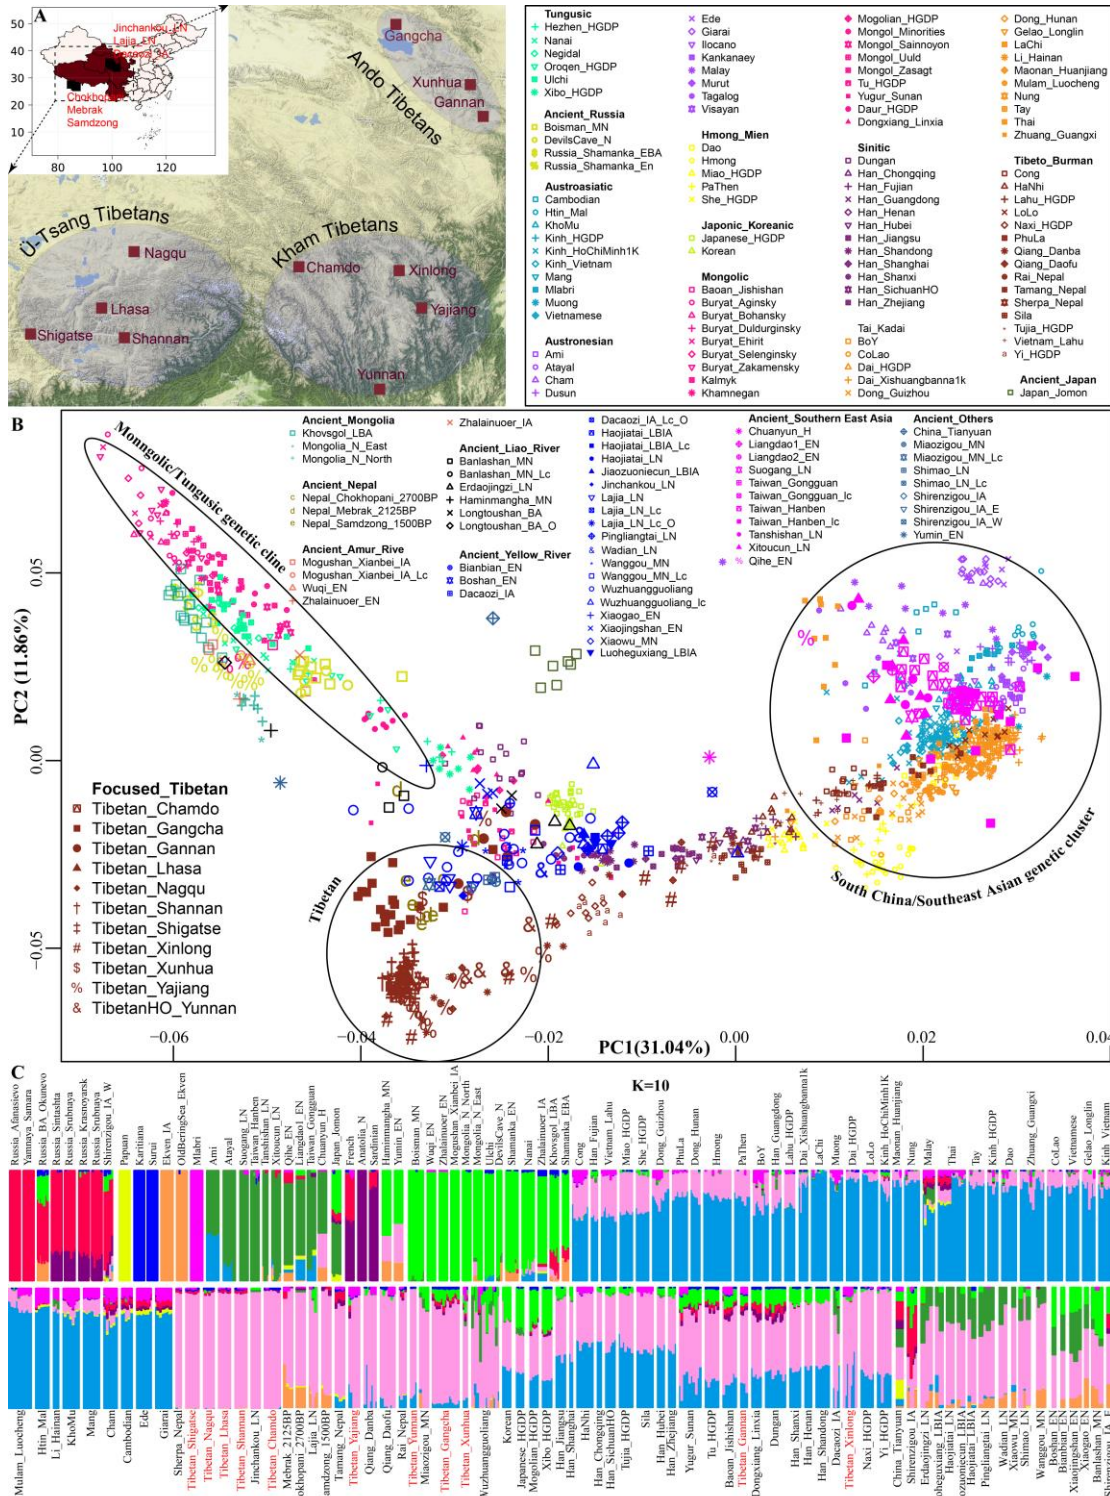

184 **Figure 1. Geographical position of Tibetans and genetic patterns of East Asians.** (A) Sampling place  
 185 of eleven modern Tibetans mainly discussed in the present study from Tibet Tibetan Autonomous Region,  
 186 Qinghai, Gansu, Sichuan and Yunnan provinces. (B) Principal component analysis (PCA) showed the  
 187 genetic similarities and differences between modern and ancient East Asians from  
 188 geographically/linguistically/ culturally different populations. Spatial-temporally diverse ancient  
 189 populations were projected onto the two-dimensional background of modern East Asian. (C).  
 190 Admixture ancestry estimation based on model-based ADMIXTURE. Here, the optimal predefined ten  
 191

192 *ancestral populations were used.*

193 We subsequently explored the patterns of genomic affinity between ancient populations and modern East  
194 Asians and projected all included ancient individuals (243 eastern Eurasian ancients) onto the genetic  
195 background of the aforementioned patterns of modern population genetic relationships. It should be  
196 pointed that this was the first comprehensive meta-analysis of modern and ancient genomes of East  
197 Asians. Here, we found four ancient population genetic clusters, Neolithic to historic southern East  
198 Asians (including Hanben and Gongguan from Taiwan, and mainland late Neolithic Tanshishan and  
199 Xitoucun people) grouped together and clustered with modern Tai-Kadai, Austronesian, Austroasiatic  
200 speakers. Neolithic to Bronze Age/Iron Age northern East Asians (both inland and coastal Houli,  
201 Yangshao, Longshan and Qijia people) grouped together and projected close to the juncture position of  
202 three main East Asian genetic lines and the northmost end of Han Chinese genetic cline, and we observed  
203 a close genetic relationship between early Neolithic Houli individuals from Shandong province  
204 associated the main subsistence strategy of the Hunter-Gathering and the Yangshao and Longshan middle  
205 and late Neolithic farmers in the geographically close Henan province, which indicated the genetic  
206 continuity of Neolithic transition from foragers to millet farmers in the early Neolithic northern China.  
207 We also identified the subtle genetic differences of these Neolithic to Iron Age individuals from northern  
208 China. These Shandong Houli individuals were localized closely with modern Mongolic-speaking Baoan,  
209 Tu, Yugur and Dongxiang, while the early Neolithic Xiaogao individuals were posited close with modern  
210 Tungusic-speaking Hezhen and Xibo. All Shandong Neolithic ancient populations were localized distant  
211 from the modern Shandong Han Chinese and shifted to modern northern Chinese minorities, which  
212 indicated modern northern Han received additional gene flow from southern East Asian ancestral lineage  
213 or ancient Houli individuals harbored more Siberian-associated ancestral lineage. Henan late Neolithic  
214 Longshan individuals (Pingliangtai, Haojiatai, and Wadian) and Bronze/Iron Age individuals (Haojiatai,  
215 Jiaozuoniecun, and Luoheguxiang) were grouped and shifted to Han Chinese genetic cline and partially  
216 overlapped with Han Chinese from Shanxi and Shandong provinces. This observed genetic similarities  
217 from late Neolithic to present-day northern East Asians from Central Plain (Henan, Shanxi, and  
218 Shandong provinces) indicated the genetic stability in the core region of Chinese civilization since the  
219 late Neolithic period. Middle Neolithic Henan Yangshao individuals (Xiaowu and Wanggou) grouped  
220 with some of Wuzhuangguoliang individuals and shifted to more northern modern minorities, and more  
221 inland middle and late Neolithic northern East Asians from Shaanxi Shimaoyao, Inner Mongolia Miaozigou  
222 and upper Yellow River (Lajia and Jinchankou) clustered together and shifted to modern Tibetans and  
223 ancient Nepal high-altitude adaptive ancestral lineage, which was partially overlapped with modern  
224 geographically close Tibetans (Gangcha Tibetan and Xunha Tibetan from Qinghai and Gannan Tibetan  
225 from Gansu) and also showed the close genetic affinity with Nepal ancients (Mebrak, Samdzong, and  
226 Chokhopani).

227  
228 For ancient populations from West Liao River, three different patterns of genetic affinity can be identified  
229 in the projected results: northern cluster (Haminmangha\_MN and Longtoushan\_BA\_O) showed a  
230 genetic affinity with Shamanka and Mongolia Neolithic people, middle Hongshan cluster localized  
231 between Mongolia minorities and modern Gangcha Tibetans, and southern cluster (Upper Xiajiadian  
232 Longtoushan\_BA and Erdaojingzi\_LN ), which was suggested both northern Mongolia Plateau Neolithic  
233 ancients associated with steppe pastoralists and Yellow River millet farmers have participated the  
234 formation of late Neolithic and subsequent populations in the West Liao River basin. These population  
235 movements, interaction and admixture recently have been fully elucidated via Ning et al(Ning, et al.  
236 2020). Here, we observed the late Neolithic populations in the southern cluster was localized between  
237 Coastal early Neolithic northern East Asians and inland Neolithic Yangshao and Longshan individuals,  
238 which indicated millet farmers from middle and lower Yellow Rivers (Henan and Shandong) have played  
239 an important role in the formation of Hongshan people or their descendants via both inland and coastal  
240 northward human population migrations. For ancient populations from Mongolia Plateau, Russia Far  
241 East, Baikal-Region, and Amur River basin, all included forty-six individuals (Neolithic to Bronze Age  
242 Shamanka, Mongolia, DevilsCave, Bosman and others) were clustered closed to modern Tungusic  
243 language speakers (Nanai and Ulchi) and some Mongolic speakers. Jomon individuals were grouped  
244 together and localized far away from modern Japanese populations in the intermediate position between  
245 Russia coastal Neolithic people and modern Taiwan Hanben and coastal Neolithic southern East Asians.

246  
247 Patterns of genetic relationship revealed from the top two components (extracting 43% variation: PC1:  
248 31.04% and PC2: 11.86%) revealed a genomic affinity between modern Tibetans, ancient Nepal  
249 populations, and modern/ancient East Asians and Siberians. To further explore the genetic structure and  
250 corresponding population relationships, we estimated the ancestry composition and cluster patterns  
251 according to the model-based maximizing likelihood clustering algorithm (**Figure 1C** and **Figure S1**).

252 We observed two northern and two southern East Asian dominant ancestries. Coastal northern East Asian  
253 ancestry (light green ancestry) maximized in Neolithic Siberians (Boisman\_MN, Wuqi\_EN,  
254 Zhalaينوer\_EN, Mongolia\_N\_North, Mongolia\_N\_East, DevilsCave\_N, and Shamanka\_EN) and  
255 modern Tungusic speakers (Ulchi and Nanai). Light green ancestry also existed in the Bronze Age to  
256 present-day populations from northeast China and Russia, as well as Coastal early Neolithic northern  
257 East Asian from Shandong province with a high proportion. The other northern ancestry enriched in  
258 modern highland Tibetans and Qijia culture-related Lajia and Jinchankou late Neolithic populations,  
259 which also maximized in Nepal Bronze Age to historic individuals and ancient northern East Asians, as  
260 well as the lowland modern Sino-Tibetan speakers, inland Hmong-Mien and Tai-Kadai language  
261 speakers. We called this Tibetan-associated ancestry as inland northern East Asians, which was the direct  
262 indicator of close genetic affinity between Tibetan and modern and ancient northern East Asians. Deep  
263 green ancestry enriched in the Coastal early Neolithic southern East Asians, Iron Age Hanben and modern  
264 Austronesian Ami and Atayal, here, we referred it as to coastal southern East Asian ancestry. Blue  
265 ancestry maximized in LaChi as the counterpart of the coastal ancestry widely distributed in Hmong-  
266 Mien and Tai-Kadai-speaking populations, this blue inland southern East Asian ancestry existed in  
267 lowland Tibetans with a relatively high proportion, including Yunnan Tibetan, Yajiang and Xinlong  
268 Tibetans and Gannan Tibetan. Besides, we found Tibetans collecting from the northeast TP harbored  
269 more coastal northern East Asian ancestry. Some Austroasiatic-associated ancestry, maximized in Mlabri,  
270 and Steppe pastoralist-like red ancestry, enriched in Bronze Age Afanasievo and Yamnaya, were also  
271 identified in Sichuan and Yunnan Kham Tibetans, and Qinghai and Gansu Ando Tibetans respectively.  
272 Ancient Nepal populations had common ancestry associated with Iron Age Ekven people from northeast  
273 Siberia.

274

#### 275 **Population differentiation between highland and lowland East Asians and substructure among** 276 **Tibetans**

277 To further explore the genetic differentiation between eleven modern Tibetans and modern or ancient  
278 reference populations, we first calculated the pairwise  $F_{st}$  genetic distance among 82 modern populations  
279 (**Table S1**, modern dataset) and 32 modern and ancient populations (**Table S2**, ancient dataset). We found  
280 a strong genetic affinity among geographically close populations. As shown in **Figures S2~3**, the high-  
281 altitude Ü-Tsang Tibetans from the south (Shigatse and Shannan), central (Lhasa), north or northeast  
282 (Nagqu and Chamdo) of Tibet Autonomous Region had the smallest  $F_{st}$  genetic distance with their  
283 geographical neighbors, followed by lowland Ando Tibetans from the northeast TP (Qinghai and Gansu)  
284 and the Kham Tibetan from the southeast region of TP (Sichuan and Yunnan) and other Tibeto-Burman  
285 speaking populations (Daofu Qiang, Tu and Yi), these observed patterns of genetic relationship was  
286 significantly different from the lowland populations, such as Hmong-Mien-speaking She sharing most  
287 ancestry with lowland East Asians (**Figure S3**). For Ando Tibetans from Qinghai and Gansu provinces,  
288 Gangcha Tibetan harbored a close genetic affinity with northern or northeastern Tibetans with the  
289 smallest  $F_{st}$  genetic distances (Chamdo and Nagqu), followed by Qiang and Tu or other geographically  
290 close Tibetans (**Figure S4**). Different patterns were observed in Gangcha Tibetan and Xunhua Tibetan,  
291 which showed the closest relationship with each other, and then followed by Tu and Yugur. We also found  
292 a relatively small genetic distance between Tibetans (Gannan and Xunhua) and Turkic-speaking Kazakh  
293 population, which showed a western Eurasian affinity of Tibetan from the northeast region of TP relative  
294 to the Tibetans from the central region of TP. **Figure S5** presented the patterns of genetic differentiation  
295 between lowland Kham Tibetans and their reference populations, and we found that Yajiang and Xinlong  
296 Tibetans from Sichuan harbored the close genetic affinity with the Tibeto-Burman speakers (Tibetan,  
297 Qiang, Yugur, and Tu) from Sichuan and Ganqing Region. Yunnan Tibetan had the smallest genetic  
298 distance with Gangcha and Chamdo Tibetans, followed by Qiang, Yi, and Tu. Among Tibetans and  
299 Neolithic to Iron Age East Asians (**Figure S6**), the top genetically closest populations harboring the  
300 smallest  $F_{st}$  values with each modern Tibetans is proved by the other modern Tibetans, and we also found  
301 Hanben population from Taiwan showed the closest relationship with modern Tibetans relative to other  
302 ancient East Asians.

303

304 Phylogenetic relationships were further estimated under the genetic variations of Eurasian modern  
305 populations and eastern Eurasian ancients via the TreeMix-based analyses. As shown in **Figure 2A**, a  
306 phylogenetic tree with no migration events showed that modern populations from similar language  
307 families tended to cluster into one group. Altai-speaking (Turkic and Mongolic) populations were  
308 clustered with Uralic speakers. Southern Austronesian East Asian first clustered with Tai-Kadai speakers  
309 and then clustered with Hmong-Mien and Austroasiatic speakers. Tibetans clustered first with each other,  
310 especially for high-altitude adaptive Ü-Tsang Tibetans and then clustered with the lowland East Asians,  
311 this observed geographical isolation showed the genetic differentiation between modern highland

312 Tibetans and lowland East Asians could be identified although shared the common originated lineage.  
 313 We further analyzed the population splits and gene flow events between modern Tibetan and 26 ancients  
 314 from eastern Eurasia (except for Anatolia\_N from Near East) with three predefined admixture events.  
 315 Modern Tibetans except for Gannan and Xinlong Tibetans were first clustered with highland Nepal  
 316 ancients and then clustered with lowland Neolithic northern East Asians and Neolithic to Bronze Age  
 317 southern Siberians, which also showed a genetic division between highland modern Tibetans and lowland  
 318 ancient northern East Asians (**Figure 2B**). The cluster patterns also showed a distant relationship between  
 319 northern and southern East Asians, as well as highland modern and ancient Tibetans and lowland southern  
 320 East Asians, which further provided evidence for some special connections or closer genetic relationships  
 321 between Tibetans and northern East Asians.  
 322

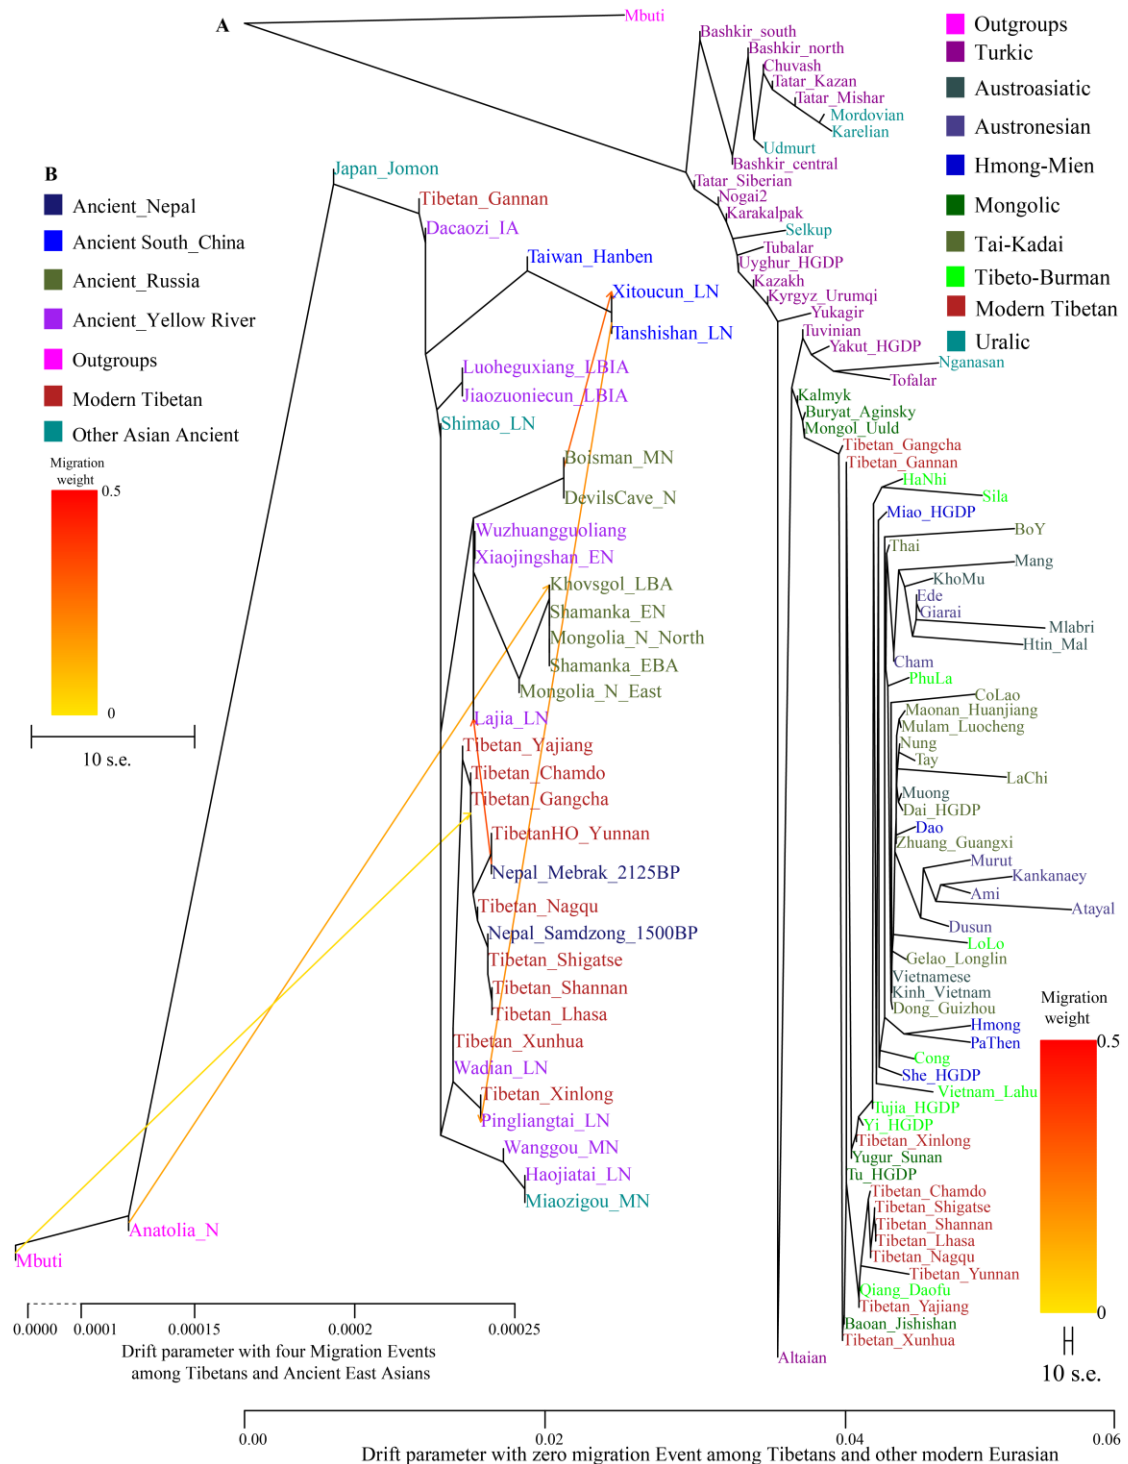

323 **Figure 2. Maximum likelihood phylogeny reconstruction based on the genetic variation from both**  
 324 **modern Tibetan and Eurasian modern reference populations. (A), modern Tibetan and Neolithic to**  
 325

326 **historic East Asian (B)**. *Mbuti* was used as the root. Focused on the phylogenetic relationship among all  
 327 modern populations, we used the patterns of genetic relationship with zero migration events. And  
 328 evaluating the evolutionary history among modern Tibetan and ancient Chinese, we included three  
 329 migration events. To better present our result, the drift branch length of *Mlabri* was shortened as the  
 330 third of the truth drift branch length due to strong genetic drift occurred in *Mlabri*.  
 331

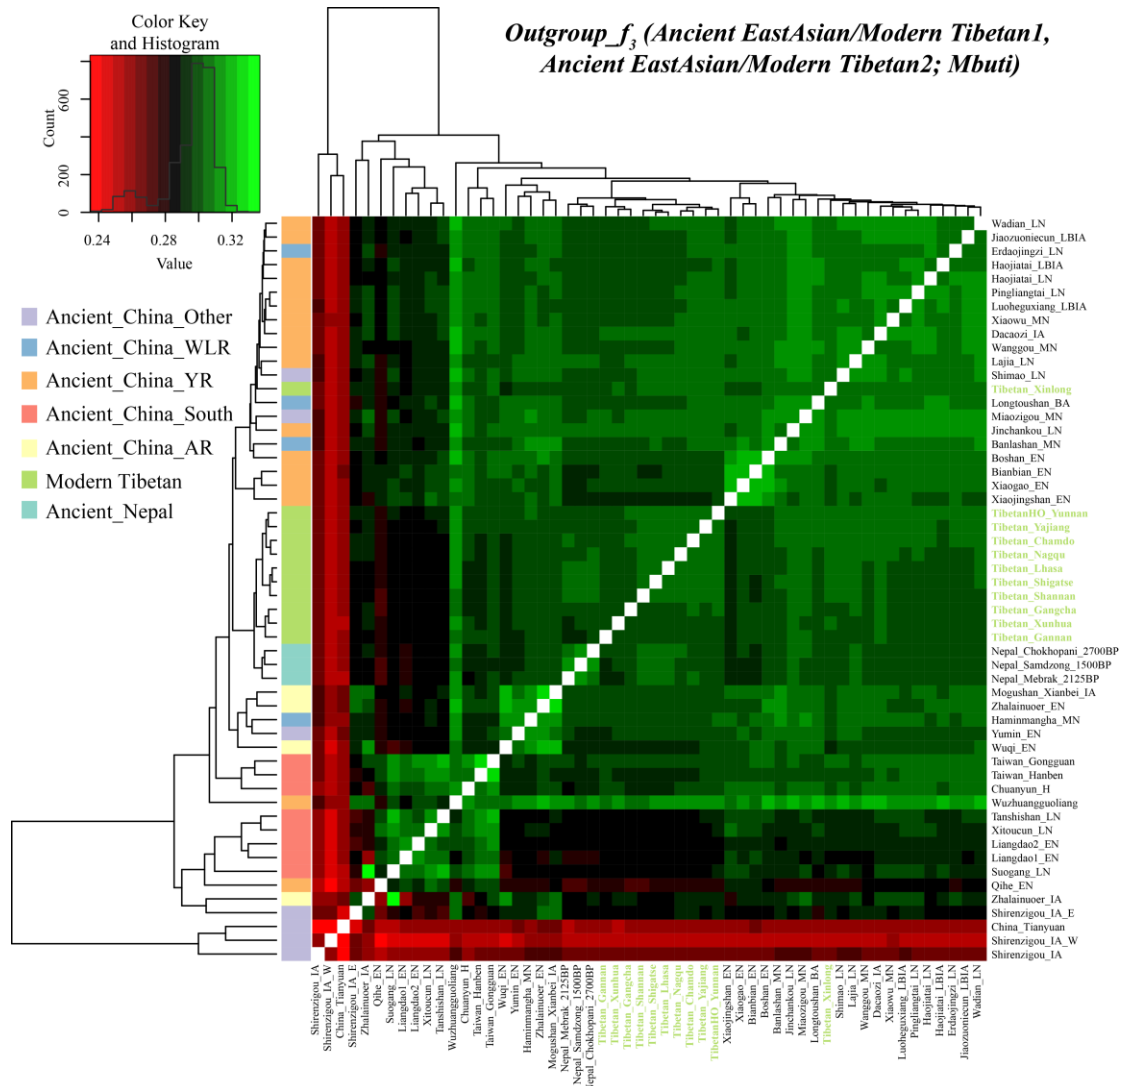

332  
 333 **Figure 3. Genomic affinity between our eleven targeted Tibetan populations and other 43 spatial-**  
 334 **temporally different East Asian populations.** The color of the bar code in the left cluster showed the  
 335 geographical origin of ancient samples.  
 336

337 Genetic affinity was further evaluated via the outgroup- $f_3$ -statistics of the form  $f_3(\text{modern Tibetans, Eurasian modern/ancient populations, Mbuti})$ . Among 184 modern populations (Table S3), the top  
 338 sharing for each Tibetans is provided by another geographically close Tibetans. Shannan Tibetan  
 339 shared most alleles with Lhasa/Shigatse/Nagqu Tibetans, and the similar patterns of population affinity  
 340 were identified in the other southern Shigatse Tibetan and central Lhasa Tibetan. However, Nagqu  
 341 Tibetan shared most alleles with the northeastern Chamdo Kham Tibetan (followed by Tibetan-Burman-  
 342 speaking Qiang from Sichuan province and other Tibetans or Sherpa), these patterns were consistent with  
 343 the population features in Chamdo Tibetan. Following by genomic affinity within Tibetans, we also found  
 344 that these five Tibetans shared the strongest genetic affinity with the lowland Han Chinese, which  
 345 is consistent with the common origin from the middle and lower Yellow River basin of Sino-Tibetan  
 346 language speakers. For lowland Kham Tibetans in Sichuan and Yunnan provinces, Xinlong Tibetan  
 347 shared the most genetic drift with Sinitic-speaking populations (Han from Shanghai, Chongqing, Hubei,  
 348 Jiangsu, and others) and other lowlands Tibeto-Burman-speaking Qiang and Tujia. Being different from  
 349 Xinlong Tibetan, geographically close Yajiang and Yunnan Tibetans shared the most drifts with Qiang  
 350 and geographically close Tibetans (Chamdo and Xinlong), followed by Sinitic speakers and other  
 351



352 Tibetans. These lowland Han or southern East Asian affinity suggested that lowland Kham Tibetans from  
 353 southwestern China harbored shifts in ancestry with southern East Asians in prehistoric and historic times  
 354 via population migration and admixture. Ando Tibetan of Gangcha Tibetan not only showed the genetic  
 355 affinity with Sinitic and Tibeto-Burman speakers but also showed the signals of Turkic-speaking  
 356 population affinity. Allele sharing results from Gannan and Xunhua Tibetans showed the Han Chinese  
 357 groups shared the most ancestry components with them.  
 358

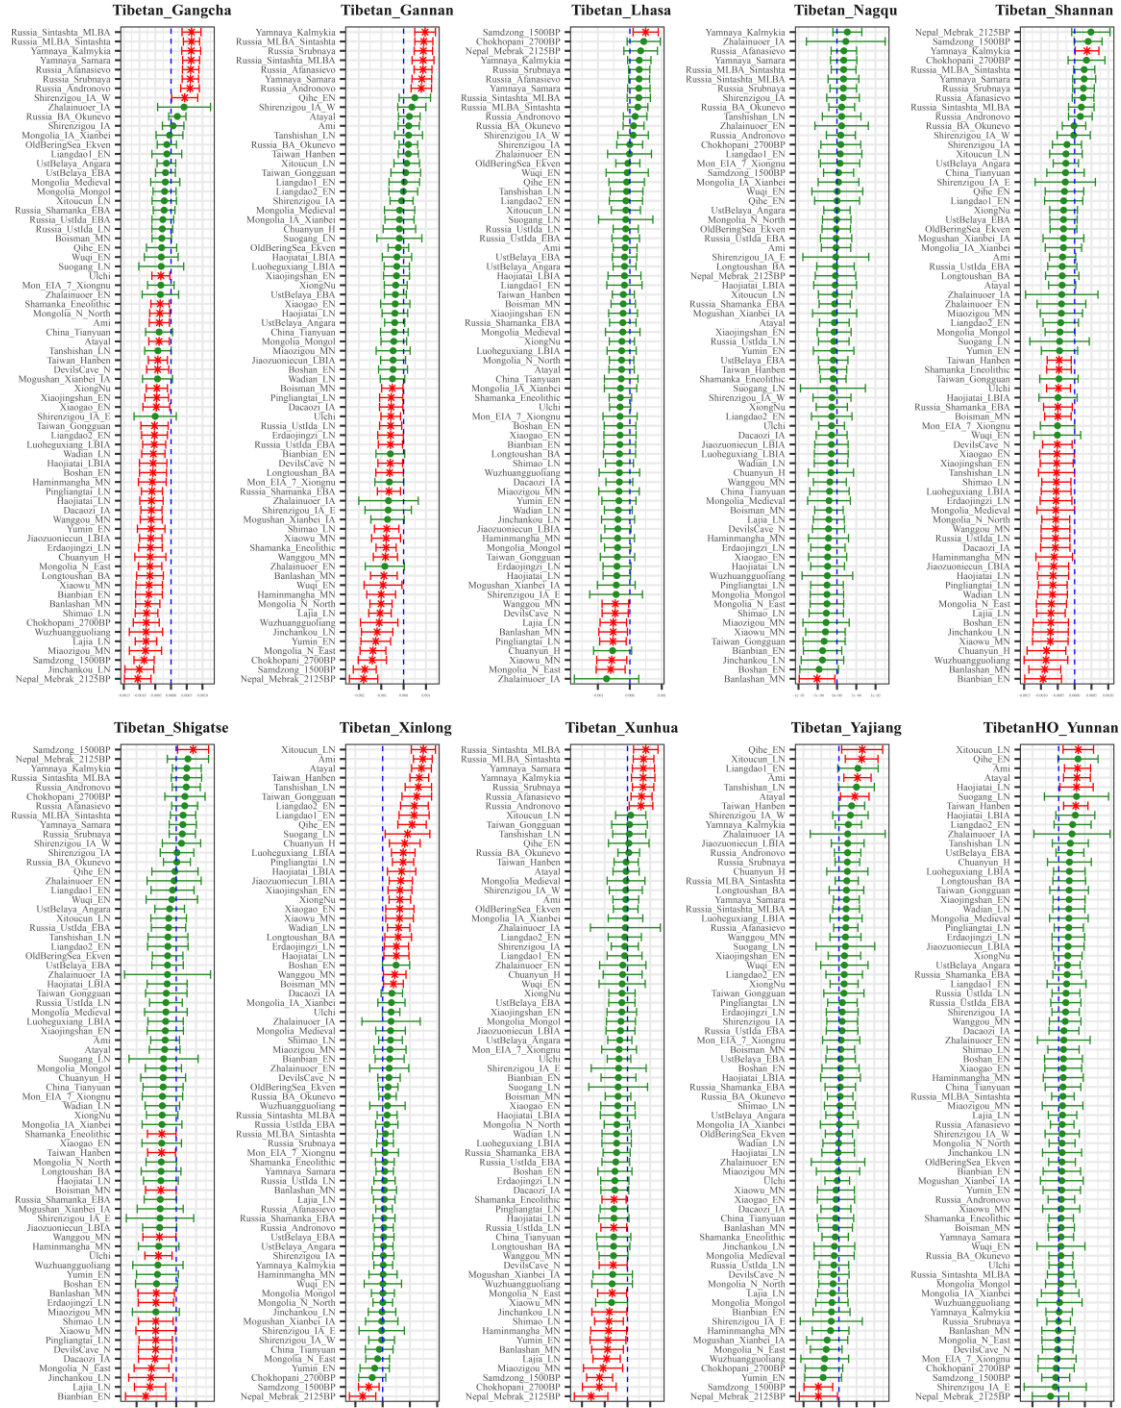

*Symmetry- $f_4$ (Tibetan1, Tibetan Chamdo; Eastern Eurasian Ancients; Mbuti)*

359 **Figure 4. Genomic affinity between modern Tibetans and eastern Eurasian ancient populations**  
 360 **inferred from four population symmetry- $f_4$  statistics of the form  $f_4$ (Tibetan1, Chamdo Tibetan; eastern**  
 361 **Eurasian ancients, Mbuti). Here, overlapping SNP loci included in the Affymetrix Human Origins**  
 362 **platform among four analyzed populations were used. We used the genetic variation of Mbuti as the**  
 363 **outgroup. Red asterisk point meant the significant value (Absolute value of Z-scores larger than three or**  
 364 **equal to three) observed in the symmetry- $f_4$  statistics and green circle point denoted the non-significant**  
 365

366  $f_4$ -statistic values (Absolute value of Z-scores less than three). All Tibetan2 were listed along the Y-axis  
 367 and  $f_4$  values were labeled along the X-axis. All tested population pairs were faceted or grouped via the  
 368 Tibetan1. Significant negative  $f_4$  values indicated that the included eastern Eurasian ancient population  
 369 shared more alleles with Chamdo Tibetan compared with Tibetan1 or Chamdo Tibetan harbored  
 370 increased eastern Eurasian ancient population-related ancestry compared with Tibetan1, and significant  
 371 positive  $f_4$  value indicated that the included eastern Eurasian ancient population shared more derived  
 372 alleles with Tibetan1 compared with Chamdo Tibetan or elucidated as Chamdo Tibetan had increased  
 373 eastern Eurasian ancient population-related ancestry relative to Tibetan1. The value of  $f_4$ -statistics equal  
 374 to zero was marked as the blue dash line. The bar indicated three standard errors.

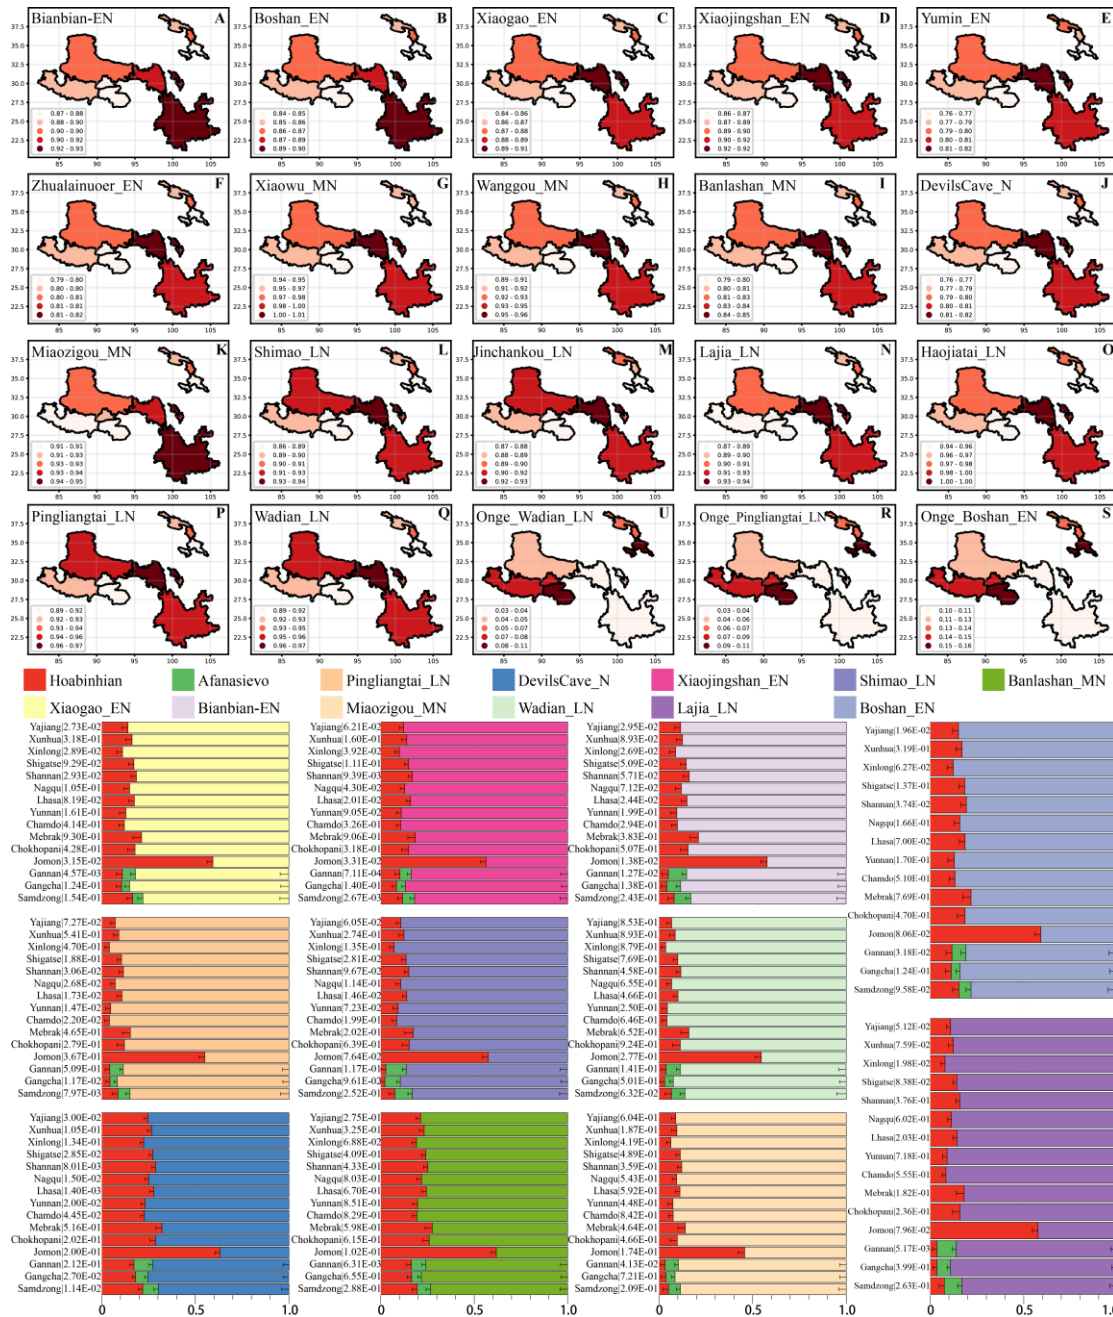

376 **Figure 5. Results of qpAdm showed the main ancestry composition of modern and ancient Tibetans and Jomon Hunter-Gatherer were the results of the mixing of ancient northern East Asian and one**  
 377 **deep lineage associated with South Asian Hunter-Gatherer Onge or Southeast Hunter-Gatherer**  
 378 **Hoabinhian (the early Asian). Heatmap showed the Northern East Asian related ancestry in the two-**  
 379 **way admixture model of Onge and the early Neolithic East Asian (A~F), middle Neolithic northern East**  
 380 **Asian (J~K) and late Neolithic northern East Asian (L~Q). Onge-related ancestry was presented with**  
 381 **three cases (U~S). Bar plots showed the ancestry composition of two-way model of Hoabinhian and East**  
 382 **Asian for modern Tibetan, Jomon and Ancient Nepal Mebrak and Samdzong people, and three-way model**  
 383 **of Hoabinhian and East Asian for modern Tibetan, Jomon and Ancient Nepal Mebrak and Samdzong people,**  
 384 **and three-way model of Hoabinhian and East Asian for modern Tibetan, Jomon and Ancient Nepal Mebrak and Samdzong people.**

385 *for Qinghai and Gansu Tibetans.*

386 Levels of allele sharing between modern Tibetans and 106 Paleolithic to historic Eurasian ancient  
387 populations (including 33 populations from Russia, 41 from China, 29 from Mongolia, three from Nepal)  
388 inferred from outgroup- $f_3$ -statistics showed that modern Tibetans had the clear connections with ancient  
389 Neolithic to Iron Age northern East Asians, which was consistent the patterns observed in the PCA, Fst,  
390 ADMIXTURE and modern population-based affinity estimations (**Table S3**). Middle-altitude Chamdo  
391 Tibetan shared the most genetic drift with Neolithic Wuzhuangguoliang, upper Yellow River late  
392 Neolithic farmers (Jinchankou and Lajia, which are the typically represented source populations for Qijia  
393 culture), followed by Iron Age Dacaozi people, Shimao people from Shaanxi, middle Neolithic  
394 Banlashan associated with Hongshan culture in North China and other northern East Asians from lower  
395 and middle Yellow River basin. Neolithic people from Russia and Mongolia and Bronze Age to historic  
396 Nepal ancients showed a relatively distant genetic relationship with modern Chamdo Tibetan (**Figure**  
397 **S7**). Different from the patterns of Chamdo Tibetan, southern and central Ü-Tsang Tibetans showed the  
398 increased ancestry associated with Nepal ancient people, and northern Nagqu Tibetan showed the  
399 intermediate trend of population affinity with 2700-year-old Chokhopani. As showed in **Figures S8-9**,  
400 lowland Tibetans from southwestern China and northeastern China showed a similar population affinity  
401 to northern East Asian ancients. The genomic affinity between modern Tibetan and 43 East Asians was  
402 visualized in **Figure 3**. Tibetans except for Xinlong Tibetan shared the most genetic drifts with each other  
403 and clustered together and then grouped with three Nepal ancients and formed the Highlander cluster,  
404 early Neolithic to Iron Age northern East Asian clustered first and then grouped with Highlander cluster.  
405 Amur and West Liao River ancient cluster also showed a closer relationship with highland Tibetans, and  
406 Xinjiang Shirenzigou people and southern East Asians kept a relatively distinct relationship with northern  
407 lowland East Asians and highland Tibetan clusters.

408

#### 409 **Admixture signatures of modern Tibetans and ancient populations from Qinghai-Tibet Plateau**

410 To further explore whether any populations harbored the obvious evidence or signals for recent genetic  
411 admixture and determine their corresponding ancestral source populations, we carried out admixture- $f_3$ -  
412 statistics of the form  $f_3(\text{Modern/ancient source population1, Modern/ancient source population2};$   
413 *Targeted Tibetan populations*) to evaluated the extent to which Tibetans from different geographical  
414 divisions possess the shared derived alleles from their modern ancestral proximity or ancient source  
415 populations. We also re-evaluated the admixture signatures of eight individuals from Nepal (Chokhopani,  
416 Mebrak, and Samdzong with geographical affinity with Ü-Tsang Tibetan) and eleven individuals from  
417 Qinghai province (Late Neolithic Lajia people and Jinchankou people, and Iron Age Dacaozi population  
418 with geographical affinity with Ando Tibetans) using this three-population comparison method and our  
419 comprehensive modern and ancient reference source database. We found different patterns of admixture  
420 signals and source populations in highland and lowland modern and ancient Tibetans (**Tables S4-18**),  
421 besides, we could also identify small but significant differences among Tibetans from one geographical  
422 region or similar culture backgrounds (Ü-Tsang Tibetans from Tibet, Ando Tibetan from Gansu and  
423 Qinghai, Kham Tibetans from Sichuan and Yunnan). With the statistic significant level of Z-scores with  
424 three, no admixture signals were observed in southern Tibetans (Shannan and Shigatse) over forty  
425 thousand tested pairs, only four in central Lhasa Tibetan (one source from 1500-year-old Samdzong and  
426 other from Kham Tibetan/Qiang, or the combination of southern Tibet Tibetan with Neolithic northern  
427 East Asians or Baikal lake ancients, **Tables S4-6**). It is interesting to found that 188 tested population  
428 pairs showed statistically significant  $f_3$ -statistic values with one source from Tibeto-Burman speakers and  
429 the other from Western Eurasians (Alan, Andronovo, Sintashta, Poltavka, Yamnaya and modern people)  
430 in  $f_3(\text{Source1, Source2}; \text{Nagqu Tibetan})$ . Tibetans from southern and central Tibet combined with lowland  
431 modern East Asians, not ancient northern and southern East Asians, could also produce significant  
432 admixture signals for Nagqu Tibetan (**Table S7**). Chamdo Tibetan localized the junction regions between  
433 Ü-Tsang Tibetan and Kham Tibetan possessed potential active cultural and human population movements  
434 and admixtures, but only one admixture signals observed here,  $f_3(\text{Lhasa Tibetan, Yajiang Tibetan};$   
435 *Chamdo Tibetan*) =  $-3.49*SE$  (**Table S8**). Three Tibetans from the Ganqing region possessed admixture  
436 signatures from over several thousand population pairs with one from modern or ancient East Asians and  
437 the other from Western Eurasians (**Tables S9-11**). Results from  $f_3(\text{Yumin\_EN, Austronesian/Tai-Kadai};$   
438 *Ganqing Tibetans*) showed the inland Neolithic northern East Asian Yumin\_EN as northern ancestral  
439 source combined with Austronesian/Tai-Kadai speakers as the southern ancestral source could produce  
440 significant  $f_3$  values, these admixture signals could be also identified in  $f_3(\text{Neolithic northern East Asians,}$   
441 *Neolithic Russian/modern Turkic/Mongolic/Indo-European speakers; Ganqing Tibetans*). Tibetans from  
442 Sichuan only showed significant signals as the result of the admixture between northern and southern  
443 East Asians or the highland Tibeto-Burman speakers and lowland East Asians, i.e.  $f_3(\text{highland Tibeto-}$   
444 *Burman speakers, lowland Tibeto-Burman speakers; Sichuan Tibetan}) < -3\*SE (**Tables S12-13**). Similar*

445 to the results for the southern Tibet Tibetan, no obvious admixture signals were observed in Yunnan  
446 Tibetan, which may be caused by the genetic isolation or obvious genetic drift that occurred recently  
447 (**Table S14**). Tests focused on the ancient populations from TP showed seven admixture signals from  
448 Qinghai Iron Age Dacaozi people (**Table S15~18**), which are the admixture results of ancient northern  
449 East Asians and modern southern East Asians, or Chamdo Tibetan-related source and Taiwan Iron Age  
450 Hanben-like population.

451

#### 452 **Intra population differentiation amongst high-altitude and low-altitude residing Tibetans inferred** 453 **from $f_4$ -statistics**

454 To gain insights into the population substructures among modern Tibetans, we first conducted symmetry-  
455  $f_4$  statistics of the form  $f_4(\text{modern Tibetan1, modern Tibetan2; modern Tibetan3, Mbuti})$ , in which we  
456 expected to observe the no significant positive or negative  $f_4$  values if no significant differences existed  
457 between modern Tibetan1 and modern Tibetan2 relative to reference Tibetan3. As shown in **Table S19**  
458 **and Figure S10**, in the tests of symmetry- $f_4$  statistics of the form  $f_4(\text{Tibetan1, Chamdo Tibetan; Tibetan2,$   
459  $Mbuti})$ , we observed that Chamdo Tibetan formed a clade with Tibetans from Nagqu and Yunnan  
460 compared with other Tibetan reference populations. All included Tibetans shared more alleles with  
461 Chamdo Tibetan compared with Gangcha Tibetan, Gannan Tibetan, and Xunhua Tibetans from Ganqing  
462 Ando Tibetan Region with significant negative  $f_4$  values. Compared to related low-altitude Tibetans  
463 (Yajiang and Xinlong), Chamdo Tibetan had more high-altitude Tibetan-related ancestry (Lhasa, Nagqu,  
464 Shigatse, and Shannan), while Gannan Tibetan shared more alleles with Xinlong Tibetan compared with  
465 Chamdo Tibetan. Compared with high-altitude Tibetan, Chamdo Tibetan shared more alleles with other  
466 Tibetans from relatively low-altitude sampling places. Results from the symmetry- $f_4$  statistics of the form  
467  $f_4(\text{Shigatse/Shannan/Lhasa Tibetans, Shigatse/Shannan/Lhasa Tibetans; Tibetan2, Mbuti})$  with non-  
468 significant Z-scores showed clear genetic homogeneity among Tibet central and southern-Ü-Tsang  
469 Tibetans (**Figures S11~12**). Negative values in  $f_4(\text{Ganqing Ando Tibetans, Shigatse/Shannan/Lhasa}$   
470  $Tibetan; Tibetans, Mbuti})$  showed all included Tibetans shared more alleles with southern Tibet Tibetans  
471 relative to Ganqing Ando Tibetans. However, northern Tibet Tibetan formed a clade with Chamdo and  
472 Yunnan Tibetans and received more high-altitude Tibetan-related derived alleles compared with Ganqing  
473 and Sichuan Tibetans. For lowland Tibetans, northwestern Chinese Gangcha and Xunhua Tibetans  
474 formed one clade, i.e., all absolute Z-scores of  $f_4(\text{Gangcha, Xunhua Tibetan; Tibetan2, Mbuti})$  are less  
475 than three (**Figure S13**). Compared with Gannan Tibetans, Qinghai Tibetans harbored more ancestry  
476 shared with Tibet Tibetan. We found no Tibetan populations shared more alleles with Gannan Tibetans  
477 relative to other Tibetans, as all  $f_4(\text{Tibetan1, Gannan Tibetan; Tibetan2, Mbuti})$  values were larger than  
478 zero. Southwestern Chinese Yunnan Tibetan formed one clade with Chamdo/Xinlong and Yajiang  
479 Tibetan, all of them belonged to Kham Tibetan (**Figures S14~15**). Lowland Sichuan and Yunnan Tibetans  
480 harbored increased Tibetan-related derived alleles compared with Ganqing Tibetans and more ancestry  
481 related to highland Tibetans compared with other highland Tibet Tibetans.

482

483 We additionally explored the observed genetic affinity and population substructure among highland and  
484 lowland Tibetans using ancient Eurasian populations (mainly collected from China, Mongolia, and  
485 eastern Siberia and some steppe pastoralists from western Eurasia) via  $f_4(\text{Modern Tibetan1, Modern}$   
486  $Tibetan2; Ancient Eurasians, Mbuti)$ . Results with no significant positive or negative Z-scores in  $f_4(\text{Ü-}$   
487  $Tsang Tibetans1, Ü-Tsang Tibetans2; Ancient Eurasians, Mbuti)$  confirmed the patterns of genomic  
488 affinity within high-altitude adaptive Ü-Tsang Tibetans (Shannan, Shigatse, Lhasa, and Nagqu), we could  
489 also identify obvious more affinity with Nepal ancients in Ü-Tsang Tibetans relative to Ando and Kham  
490 Tibetans (**Figures S16~19**). Compared with Shannan Tibetan, Nagqu Tibetan harbored increased  
491 ancestry associated with lowland ancient populations of Neolithic/Historic southern East Asians in the  
492 southeastern coastal region of South China (Tanshishan\_LN and Chuanyun\_H) to as north far as Baikal  
493 Region (Russia\_UstIda\_LN). Compared to Tibetans from Qinghai Ando Tibetans, Nagqu Tibetan owned  
494 both increased Nepal ancient-related ancestry and increased Late Neolithic Lajia related ancestry relative  
495 to Xunhua Tibetan, and it also harbored additionally increased ancestry related to coastal Late Neolithic  
496 southern East Asians of Tanshishan\_LN, middle Yellow River Middle Neolithic to Iron Age ancient  
497 populations (Wanggou\_MN, Haojiatai\_LBIA, and Jiaozuoniecun\_LBIA), Upper Xiajiadian culture of  
498 Longtoushan\_BA, inland Neolithic northern East Asians (Yumin\_EN and Shimao\_LN) and other upper  
499 Yellow River Late Neolithic Jinchankou and Iron Age Dacaozi. Here, we found a closer affinity between  
500 upper Yellow River ancient populations with Nagqu Tibetan, not with geographically close Gangcha  
501 Tibetan, which suggested that ancient populations from Lajia, Jinchankou and Dacaozi may be the direct  
502 ancestors of modern Nagqu Tibetan. Significant negative  $f_4$  values were observed in Chinese Ando  
503 Tibetans via  $f_4(\text{modern Tibetan1, Ganqing Ando Tibetans; Bronze Age stepped pastoralists, Mbuti})$ ,  
504 which suggested that Ando Tibetan harbored increased ancestry with Sintashta-like, Yamnaya-related

505 and other ancestry related to middle and late Bronze Age Steppe pastoralists (Afanasiovo, Srubnaya,  
 506 Andronovo and Xinjiang Iron Age Shirengzigu populations). Although strong genetic affinity among  
 507 Ando Tibetans was confirmed with the similar patterns of  $f_4$ -based sharing alleles and non-significant  
 508 statistical results in symmetry- $f_4$  statistics. Negative  $f_4$  values with Z-scores larger than three in  
 509  $f_4$ (Gangcha Tibetan, Gannan Tibetan; Ami/Atayal/ Hanben/ Gongguan/Tanshishan\_LN/Qihe\_EN, Mbuti)  
 510 showed that Gannan Tibetan harbored increased southern East Asian ancestry represented by modern  
 511 Austronesian or Proto-Austronesian-related early Neolithic to present-day southeastern coastal/island  
 512 populations (Figures S20~22). The same southern East Asian affinity of Gannan Tibetan was also  
 513 identified compared with Tibet Ü-Tsang Tibetans.  
 514  
 515

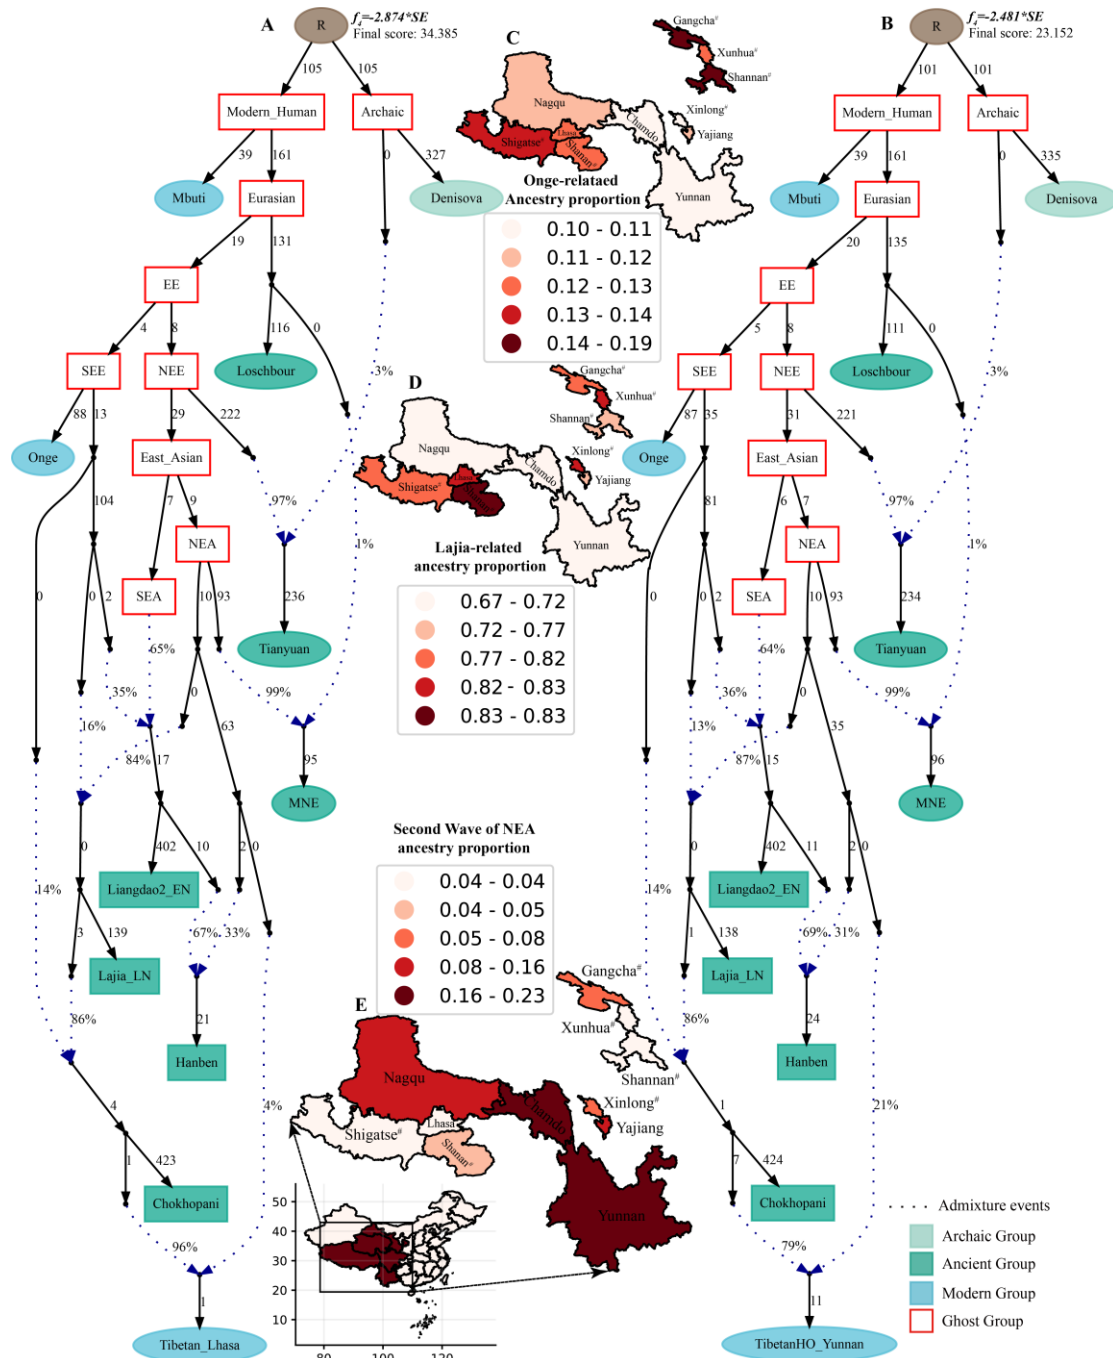

516 **Figure 6. Admixture graph model of East Asians and modern Tibetans based on the Human Origin**  
 517 **dataset. Admixture history of highland Tibetan from Lhasa (A) and lowland Tibetan from Yunnan (B).**  
 518 **Heatmap showed the ancestry composition of modern Tibetans from three source populations: deep**  
 519 **hunter-gatherer One-related ancestry (C), the first batch of Neolithic farmer associated ancestry (D)**  
 520 **and the second batch of Neolithic farmer related ancestry (E). Denisovan and Central African of Mbuti were**  
 521

522 used as the Archaic and modern roots respectively. Western Eurasian was represented by Loschbour.  
 523 Deep southern Eurasian (SEE) and northern Eurasian (NEE) were represented by South Asian Hunter-  
 524 Gatherer of Onge and 40,000-year-old Tianyuan people. East Asian was subsequently diverged as  
 525 northern East Asian (NEA) and southern East Asian (SEA). All  $f_4$ -statistics of included populations are  
 526 predicted to within 3 standard errors of their observed values. Branch lengths are given in units of 1000  
 527 times the  $f_2$  drift distance (rounded to the nearest integer). Pound signs denoted the modern populations  
 528 added to the basic model of A or B with larger Z-scores or Zero internal branch length. Blue dotted lines  
 529 denoted admixture events with admixture proportions as shown.  
 530

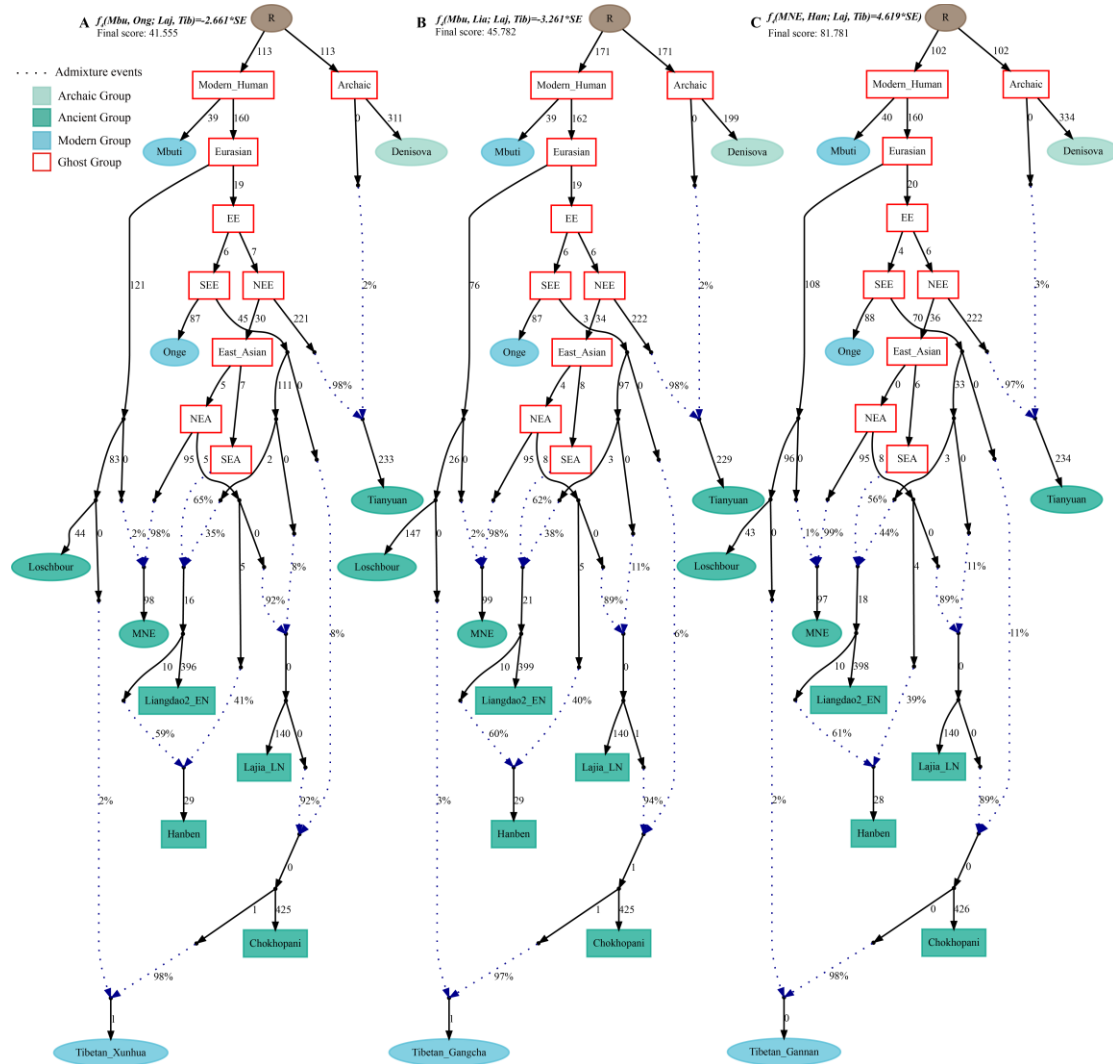

531 **Figure 7. Admixture graph model of East Asians and modern Tibetans from the northeast Tibet**  
 532 **Plateau based on the Human Origin dataset. Admixture history of Tibetan from Xunhua (A), Tibetan**  
 533 **from Gangcha (B) and Tibetan from Gannan (C).**  
 534  
 535

536 Results of the four-population comparison analysis focused on Kham Tibetans were presented in **Figure**  
 537 **4** and **Figures S23~25**. The results of  $f_4$ (Nagqu Tibetan, Chamdo Tibetan; eastern Eurasian ancients,  
 538 Mbuti) suggested that Nagqu Tibetan formed one clade with Chamdo Tibetan except for the reference  
 539 population of Banlashan-MN with significant negative  $f_4$  value, which meant that Chamdo Tibetan  
 540 harbored increased middle Neolithic northern East Asian Banlashan-related ancestry, and Banlashan  
 541 people was evidenced to be associated with archeologically attested Hongshan culture. Compared with  
 542 Lhasa Tibetan,  $f_4$ (Lhasa Tibetan, Chamdo Tibetan; eastern Eurasian ancients of  
 543 DevilsCave\_N/Mongolia\_N\_East/Banlashan\_MN/Wanggou\_MN/Xiaowu\_MN/Pingliangtai\_LN/Lajia\_LN,  
 544 Mbuti) showed significant negative statistical results, which suggested increased Russia- or  
 545 Mongolia-related Neolithic ancestries (DevilsCave\_N/Mongolia\_N\_East), middle Neolithic Hongshan  
 546 culture-related ancestry (Banlashan\_MN), middle Yellow River middle to late Neolithic Yangshao or  
 547 Longshan farmer-related ancestry (Wanggou\_MN/Xiaowu\_MN/Pingliangtai\_LN) and upper Yellow  
 548 River late Neolithic Qijia culture-related ancestry (Lajia\_LN) in Chamdo Tibetan relative to Lhasa

549 Tibetan. The genetic affinity showed a link between ancient populations from the TP and northern East  
550 Asia during the early Neolithic period. Compared with southern Ü-Tsang (Shannan) Tibetans, Chamdo  
551 Tibetan harbored increased ancestry related to different ancestral populations from the lowland East  
552 Asian, as  $f_4(\text{Shannan Tibetan}, \text{Chamdo Tibetan}; \text{both southern and northern ancient East Asians and}$   
553  $\text{ancient Siberians}, \text{Mbuti})$  showed significant negative  $f_4$ -statistic values. First, coastal late Neolithic  
554 southern East Asian Tanshishan, Iron Age Taiwan Hanben islander, and historic Chuanyun people shared  
555 more drift with Chamdo Tibetan than with Shannan Tibetan. Second, Coastal early Neolithic northern  
556 East Asians from Shandong province (Xiaojingshan\_EN, Xiaogao\_EN, Bianbian\_EN, and Boshan\_EN)  
557 shared more genetic drift with Chamdo Tibetan. Third, middle Neolithic to late Bronze Age and Iron Age  
558 ancient populations from Henan province in the middle and lower Yellow River shared more derived  
559 alleles with Chamdo Tibetan, such as middle Neolithic people of Wanggou and Xiaowu, late Neolithic  
560 people of Wadian, Pingliangtai and Haojiatai, and Late Bronze Age and Iron Age Jiaozuoniecun and  
561 Luoheguxiang. Fourth, Neolithic populations from the middle Yellow River basin (Wuzhuangguoliang  
562 and Shimao\_LN) shared more alleles with Chamdo Tibetan. Fifth, three populations from late Neolithic  
563 (Lajia\_LN and Jinchankou\_LN) to Iron Age (Dacaozi\_IA) in the upper Yellow River shared more alleles  
564 with Chamdo Tibetan than with Shannan Tibetan. Sixth, three Neolithic populations from West Liao  
565 River, including Haminmangha\_MN, Banlashan\_MN, and Erdaojingzi\_LN, shared more alleles with  
566 Chamdo Tibetans. Seventh, ancestral populations related to the Neolithic to present-day people from  
567 Mongolia and Russia, including Mongolia\_N\_East, Russia\_UstIda\_LN, Mongolia\_N\_North,  
568 Mongolia\_Medieval, DevilsCave\_N, Boisman\_MN, Russia\_Shamanka\_EBA, Shamanka\_Eneolithic  
569 and modern Ulchi, shared more alleles with Chamdo Tibetans. Compared with Shigatse Tibetan, similar  
570 patterns of sharing derived alleles were observed. Compared with Ando Tibetans, Chamdo Tibetan shared  
571 an increased ancestry component associated with both highland and lowland ancient populations. And  
572 compared with Tibetans from Sichuan province (Xinlong Yajiang Tibetans), Chamdo Tibetan shared  
573 more alleles with 2125-year-old Mebrak and 1500-year-old Samdzong. Similar to the patterns of genetic  
574 affinity observed in Chamdo Tibetan, the other three Kham Tibetan also had increased both northern and  
575 southern East Asian ancestry.

#### 576 577 **Spatiotemporal comparison analysis among modern Tibetan and all Paleolithic to Historic East** 578 **Asians and genetic admixture and continuity of modern Tibetans**

579 To clearly elucidate the patterns of genetic structures and population dynamics of overall East Asians and  
580 provide new insights into the origin of culturally/geographically diverse Tibetans, we carried out both  
581 spatial and temporal difference explorations via  $f_4$ -statistics. Focused on four early coastal Neolithic  
582 northern East Asians from Shandong province,  $f_4(\text{Coastal Neolithic northern East Asian1}, \text{Coastal}$   
583  $\text{Neolithic northern East Asian2}; \text{Modern Tibetans/Ancient East Asians}, \text{Mbuti})$  revealed the similar  
584 genetic relationship between modern Tibetans and these Neolithic northern East Asians (**Figure S26**).  
585 Increased coastal Neolithic southern East Asian related ancestry could be identified in Xiaojingshan\_EN  
586 people, which showed a close connection with coastal populations in East Asia and was wonderfully  
587 illustrated in a recent ancient study by Fu et al (Yang, et al. 2020). Results from  $f_4(\text{Bronze/Iron Age Henan}$   
588  $\text{populations}, \text{Neolithic to Iron Age Henan populations}; \text{Eastern Modern Tibetan/Ancient East Asians},$   
589  $\text{Mbuti})$  only revealed Luoheguxiang people had increased ancestry associated with modern Austronesian-  
590 speaking Ami (**Figures S27–29**) relative to Wanggou\_MN. Late Neolithic Haojiatai population had more  
591 southern East Asian ancestry related to Xitoucun\_LN and Hanben people compared with Wanggou\_MN  
592 (**Figure S30**), similar southern coastal population (Ami, Atayal, and Hanben-related sources) affinity  
593 was observed in Pingliangtai\_LN, but not in Wadian\_LN and middle Neolithic Wanggou\_MN and  
594 Xiaowu\_EN (**Figures S31–34**). Focused on ancients from Shaanxi and Inner Mongolia, we found  
595 modern Tibetans and northern and southern East Asians from the Yellow River and South China shared  
596 more alleles with late Neolithic Shimao populations (**Figure S35**). Temporal analysis among upper  
597 Yellow River ancients showed all modern Tibetans showed the similar relationship with them, although  
598 Iron Age Dacaozi people harbored more southern East Asian ancestry, as revealed by significant positive  
599  $f_4$  values in  $f_4(\text{Dacaozi_IA}, \text{Lajia_LN}; \text{Neolithic Qihe and Xitoucun/ Iron Age Gongguan and Hanben/}$   
600  $\text{modern Ami and Atayal}, \text{Mbuti})$ . These results suggested that population movements from South China  
601 have a significant influence on the gene pool of northeastern populations in the TP at least from Iron Age  
602 (**Figure S36**). Symmetrical relationships among East Asians with temporally different Nepal ancient  
603 populations was evidenced in **Figure S37**.

604  
605 Next, we also explored the similarities and differences of the shared genetic profiles related to northern  
606 Neolithic East Asians via the spatial comparison analysis in modern Tibetans and all available ancient  
607 East Asians. We sought up a series of symmetry  $f_4$ -statistics, where we compared all eleven modern  
608 Tibetans and other ancient East Asians against the geographically different ancient northern East Asians

609 and ancient Tibetans. **Figures S38–41** showed the shared alleles between targeted populations against  
 610 the lowland early Neolithic northern East Asians and others. Symmetry  $f_4$  (*Northern East Asians,*  
 611 *Chokhopani; Modern Tibetan/Neolithic to Historic East Asians, Mbuti*) was used to determine the  
 612 lowland and highland East Asian affinity. Compared with four coastal Neolithic Shandong populations,  
 613 we found that Ü-Tsang Tibetans had the strong highland East Asian affinity. Besides, comparing against  
 614 coastal and inland ancients revealed that modern Tibetans had a strong inland northern East Asian affinity,  
 615 especially with late Neolithic Lajia people from the upper Yellow River. This Lajia affinity or inland  
 616 northern East Asian affinity persisted when we substituted inland Yumin\_MN with the coastal Neolithic  
 617 northern East Asians (**Figure S42**) but disappeared when we substituted the latter Neolithic with the early  
 618 Neolithic northern East Asians (**Figures S43–48**). We summarized the overall highland and lowland East  
 619 Asian affinities of Tibetans in **Figure S49**, which showed the Ando and Kham Tibetans had lowland  
 620 northern East Asian affinity, Ü-Tsang Tibetans with Nepal ancient affinity.  
 621

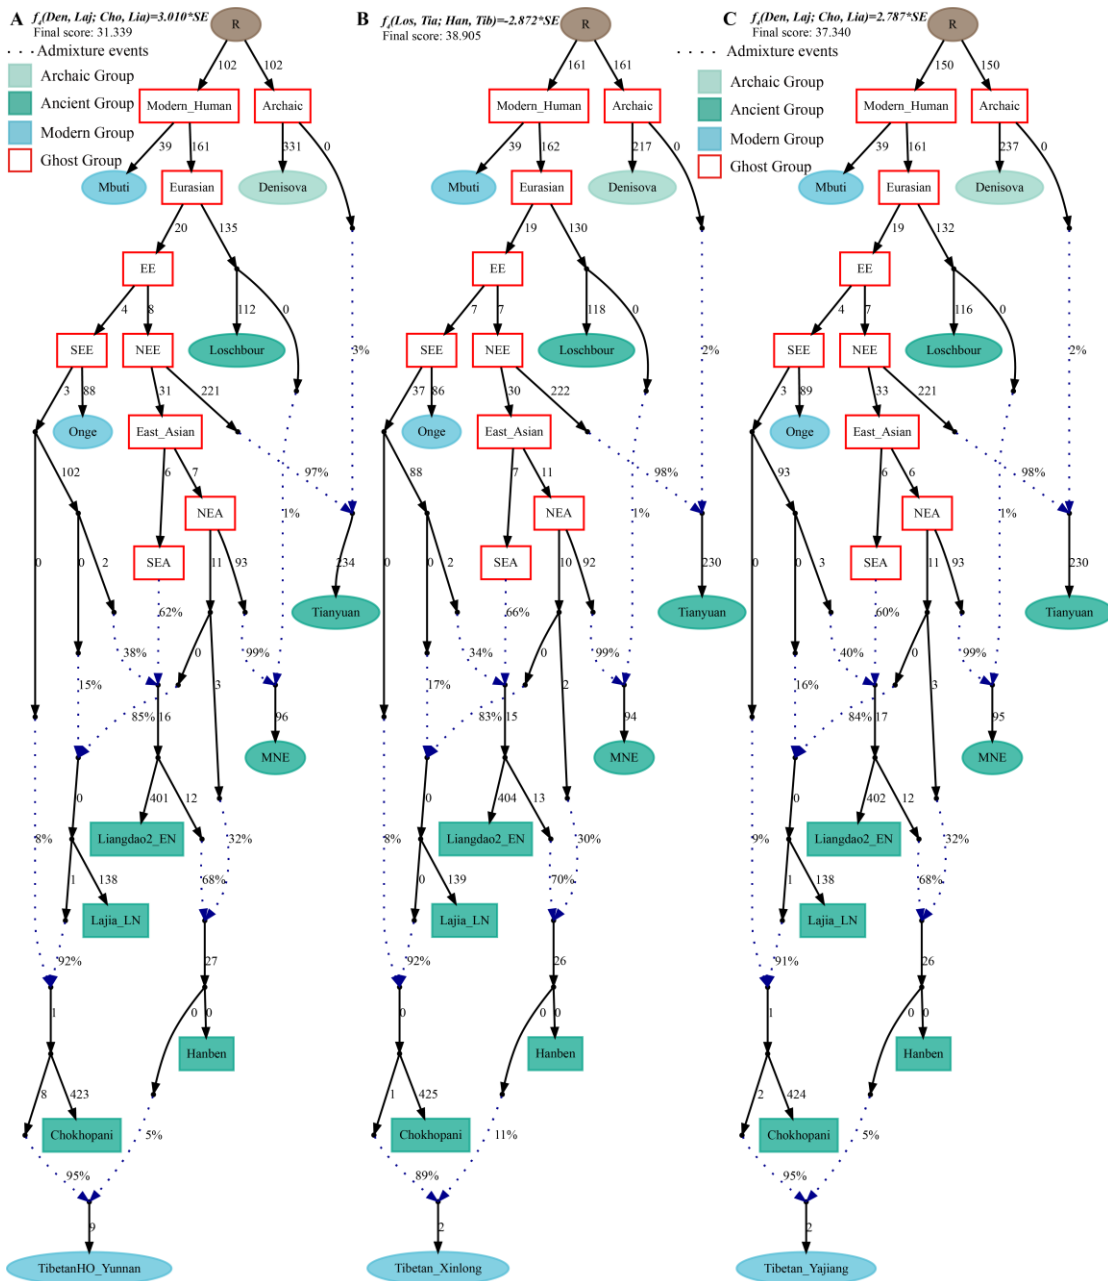

622 **Figure 8. Admixture graph model of East Asians and modern lowland Tibetans based on the Human**  
 623 **Origin dataset. Admixture history of lowland Tibetan from Yunnan (A), Tibetan from Xinlong (B) and**  
 624 **Tibetan from Yajiang (C).**  
 625  
 626

627 **Aforementioned population genomic studies have identified population substructures among modern**  
 628 **Tibetans (Ü-Tsang, Ando and Kham Tibetans) and their closest relationship with northern East Asians**



629 and affinity to southern East Asians and Siberians, which was confirmed with the negative  $f_4$ (*Reference*  
630 *populations, modern Tibetans; northern/southern East Asians and Siberians, Mbuti*) values. Here,  
631 consistent with three subgroups respectively showing the affinity to northern and southern East Asians  
632 and Siberians, we further assumed that they descended directly from one of these source populations  
633 without additional genetic admixture, and thus we would expect non-significant  $f_4$  values in (*Source*  
634 *population, modern Tibetans; Reference populations, Mbuti*), as negative values denoted additional gene  
635 flow into modern Tibetans. We first assumed modern Tibetans were the direct descendants of southern  
636 East Asians which is associated with the Yangtze Rice farmer ancestry. As shown in **Figures S50–58**, we  
637 observed significant negative  $f_4$  values when we used northern East Asians or Siberians as the reference  
638 populations, which indicated obvious gene flow events from these reference populations and close  
639 genetic relationship. To dissect the additional gene flow events when we assumed that Tibetans' direct  
640 ancestor is coastal Neolithic northern East Asian related ancestral populations, we conducted  
641  $f_4$ (*Shandong ancients, Modern Tibetans; Neolithic to Historic East Asians, Mbuti*) and found only Nepal  
642 ancients showed a negative  $f_4$  values, which is consistent with the common origin from middle and lower  
643 Yellow River basin of Sino-Tibetan speakers (**Figures S59–62**). The patterns were confirmed when we  
644 assumed Yangshao and Longshan farmers or their related populations (**Figure S63–71**), Shaanxi ancients  
645 (**Figure S72–74**) and other ancient northern East Asians and southern Siberians (**Figures S75–88**) as the  
646 direct ancestor of modern Tibetans. As shown in **Figures S75 and S88**, assuming Yumin or Ulchi as their  
647 direct ancestor, additional ancestral gene flows from the southern East Asians (Hanben and Tanshishan  
648 et.al.) and Yellow River farmers were identified. Assuming the Nepal ancients as direct ancestors,  
649 obvious additional gene flow events that occurred from the lowland ancient East Asians were detected  
650 in Kham Tibetans (**Figures S89–91**). Additional predefined ancestral populations from Russia and  
651 Chinese Xinjiang further confirmed the strong East Asian affinity (**Figures S92–104**).

652

#### 653 **Ancestry compositions of modern and ancient Tibetans via *qpWave/qpAdm* and *qpGraph***

654 Considering the close connections of modern Tibetan and Neolithic northern East Asians and paternity  
655 affinity between Tibetan, Onge, and Jomon(Shi, et al. 2008) (the latter two have been evidenced as the  
656 early Asian lineage with the close relationship with 7700-year-old Hoabinhian from southeast  
657 Asia(McColl, et al. 2018)), we further explored the number of ancestral populations of modern Tibetans,  
658 Nepal ancients and Jomon Hunter-gatherer from the Japanese archipelago using the *qpWave* and  
659 estimated their corresponding ancestry proportion under one-way, two-way and three-way admixture  
660 models via *qpAdm*. The *qpWave* results ( $p_{\text{rank}} < 0.05$ ) showed that there were needed at least two  
661 ancestral populations to explain the observed genetic variations in targeted populations. We first  
662 employed the two-way model of Onge and six inland/coastal early Neolithic northern East Asians and  
663 found inland Yumin failed to fit our targeted populations' genetic variations (all  $p$  values  $< 0.05$ ).  
664 Xiaogao\_EN-Onge two-way model could be well fitted all modern Tibetans except for Gannan Tibetan  
665 with the Xiaogao-related ancestry proportion ranging from 0.846 in Shannan Tibetan to 0.906 in Xinlong  
666 Tibetan. 2700-year-old Chokhopani, similar to geographically close Shigatse Ü-Tsang Tibetan, could be  
667 fitted as the result of admixture of 0.861 northern East Asian Xiaogao-related ancestry and 0.139 Onge  
668 related ancestry (**Table S20 and Figure 5**). Younger Nepal ancient could be modeled as higher ancestry  
669 from Onge-related ancestry and lower ancestry associated with northern East Asian lineage. Jomon could  
670 be modeled as deriving 0.484 of its ancestry from populations related to Xiaogao\_EN and 0.516 from  
671 groups related to Onge with marginal statistical significance. We substituted Boshan\_EN and  
672 Bianbian\_EN with Xiaogao\_EN, we could obtain similar results, however, when we substituted  
673 Xiaojingshan\_EN with Boshan\_EN, 1500-year-old Samdzong failed to fit our two-way model ( $p_{\text{rank}1} =$   
674  $0.00007$ ). Zhalainuoer\_EN-Onge could be successfully fitted highland Tibet Tibetan and Yunnan Tibetan  
675 with higher Onge-related ancestry but failed to the other Ando and Kham Tibetans. Using middle  
676 Neolithic East Asian as the source, the Xiaowu\_MN-Onge model failed to all targets, and the  
677 DevilsCave\_N-Onge model could be only fitted the Sichuan Tibetans, Jomon, and Chokhopani with a  
678 higher proportion of Onge-related ancestry. Except for populations with a western Eurasian affinity  
679 (Ando Tibetans and Samdzong), all remaining modern and ancient populations could be fitted as the  
680 admixture between Onge and middle Neolithic Wanggou\_MN (Tibetan: ranging from 0.898 in Shannan  
681 Tibetan to 0.96 in Xinlong Tibetan; 0.518 for Jomon; 0.889 for Mebrak and 0.914 for Chokhopani),  
682 Banlashan\_MN (0.795 in Shannan to 0.847 in Xinlong for Tibetan, 0.458 for Jomon and 0.8 for  
683 Chokhopani) and Miaozigou\_MN (0.906 to 0.952 for Tibetans, 0.615 for Jomon, 0.906 for Mebrak and  
684 0.933 for Chokhopani). We further used the late Neolithic northern East Asian as the source, Gangcha,  
685 and Gannan Tibetans and Samdzong failed in all models except for Gangcha Tibetan in Wadian\_LN-  
686 Onge model (0.932: 0.068) and Haojiatai\_LN-Onge (0.973: 0.027), Samdzong in Haojiatai\_LN-Onge  
687 (0.908: 0.092). All the remaining populations could be fitted as the admixture of higher late Neolithic  
688 East Asians related ancestry and smaller Onge related ancestry. We additionally substituted Hoabinhian

689 with Onge as the southern source representative for deep lineage and used aforementioned early Neolithic  
 690 to late Neolithic northern East Asians as the other source to perform the two-way admixture model for  
 691 estimating ancestry proportion of modern Tibetan without Gangcha and Gannan Tibetans and Nepal  
 692 ancients except for Samdzong and Jomon. As shown in **Figure 5**, the good fit could be acquired with  
 693 slightly variable ancestry composition compared with Onge-based two-way models. We finally  
 694 employed the Afanasievo (significant negative  $f_3$  value in admixture- $f_3$ -statistics) as the western Eurasian  
 695 source in a three-way admixture model to fit the genetic variations in Ando Gangcha and Gannan  
 696 Tibetans and Samdzong. All three populations could be successfully fitted when we introduced the  
 697 Bronze Age steppe pastoralists related ancestry.  
 698

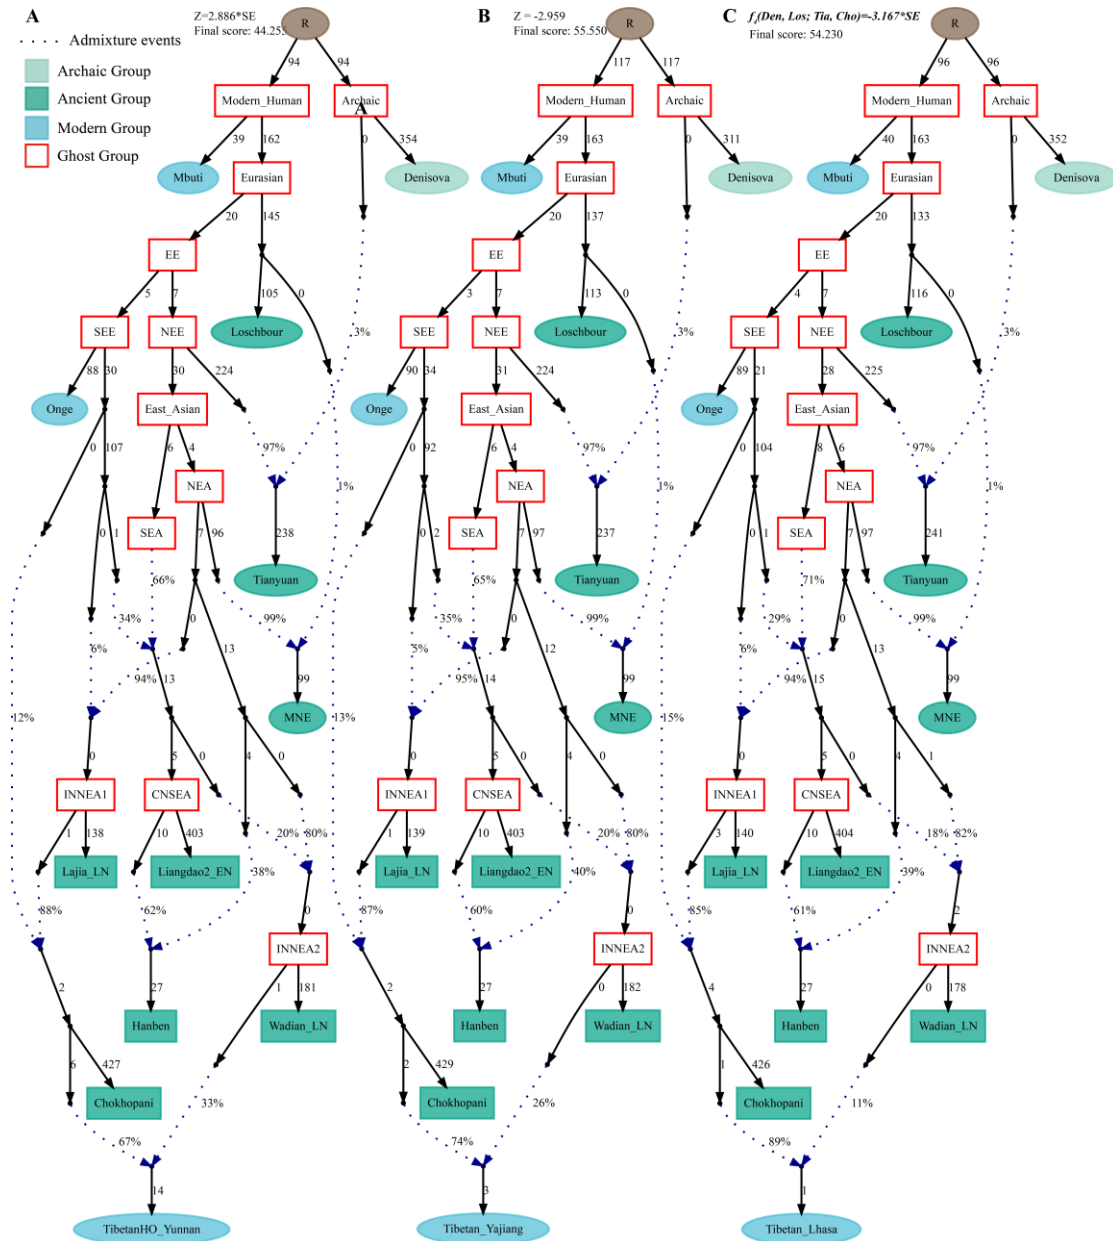

699 **Figure 9. Admixture graph model of modern highland and lowland Tibetans based on the Human**  
 700 **Origin dataset using late Neolithic Wadian people as the source of the second migration into Tibet**  
 701 **Plateau. Admixture history of lowland Tibetan from Yunnan (A), Tibetan from Yajiang (B) and highland**  
 702 **Tibetan from Lhasa (C).**  
 703  
 704

705 Finally, to comprehensively summarize the phylogenetic relationships and reconstruct the population  
 706 history between Neolithic East Asians and modern Tibetans in one phylogenetic framework, we built a  
 707 series of admixture graph models via *qpGraph*. The core model of our admixture graph included archaic  
 708 Denisovan and central African Mbuti as the roots, Loschbour as the representative of western Eurasian,  
 709 modern Onge Hunter-Gatherer from Andaman island and 40,000-year-old Tianyuan (3% ancestry from

710 Denisovan) as representatives of deep lineages of southern East Eurasian and northern East Eurasian. As  
711 shown in **Figure 6A**, East Asians diverged into northern lineage (represented by East Mongolia Neolithic  
712 population with 1% gene flow from western Eurasian) and southern lineage (represented by  
713 Liangdao2\_EN with 35% ancestry deriving from lineages close to Onge). Here, late Neolithic Qijia-  
714 related Lajia people could be fitted as the admixture of 84% lineage related to northern East Asians and  
715 16% lineage associated with south Asian Onge, and 2750-year-old Chokhopani could be modeled as  
716 driving 86% of its ancestry from Lajia\_LN and 14% from Onge side. Our model provided ancient  
717 genomic evidence of the co-existence of both Paleolithic Hunter-Gatherer ancestry associated with the  
718 indigenous TP people and Neolithic northern East Asian ancestry in Chokhopani culture-related ancient  
719 Tibetan and late Neolithic Lajia people. We subsequently added all eleven modern Tibetans to the  
720 aforementioned scaffold model and found all Ü-Tsang Tibetans and Kham Tibetans except for Xinlong  
721 Tibetan could be fitted as direct descendants from 2,700-year-old Chokhopani with additional gene flow  
722 from one northern East Asian ancestry populations, which also contributed additional 33% ancestry to  
723 Iron Age Hanben people. This gene flow could be regarded as the epitome of the second wave of  
724 Neolithic expansion into TP. Thus, results from **Figure 6** suggested that seven Tibetans could be fitted  
725 well with three sources of ancestry: Onge-related, Lajia\_LN-related and second wave of northern East  
726 Asian lineage-related, in respective proportion of 0.1235, 0.8265, and 0.05 (Shannan); 0.144, 0.816, and  
727 0.04 (Shigatse); 0.1344, 0.8256, and 0.04 (Lhasa), 0.1176, 0.7224, and 0.16 (Nagqu); 0.1001, 0.6699,  
728 and 0.23 (Chamdo); 0.1106, 0.6794, and 0.21 (Yunnan); 0.1232, 0.7568, and 0.12 (Yajiang). We could  
729 obtain a good fit when considering one gene flow event for Ganqing Ando Tibetans with the Loschbour-  
730 related ancestry proportion varying from 2% to 3% (**Figure 7**). To further explore the best ancestral  
731 source proximity of the second migration wave, extended admixture graphs introducing inland/coastal  
732 northern and southern East Asian Neolithic populations were reconstrued. As shown in **Figure 8**, the  
733 second wave into lowland Kham Tibetans with Neolithic southern East Asian affinity could be well fitted  
734 as directly driving from Hanben-related ancestral population with the proportion ranging from 5% to  
735 11%. We then added northern coastal early Neolithic Houli Boshan People, middle Neolithic Xiaowu  
736 Yangshao people, late Neolithic Wadian people and Bronze/Iron Age Haojiatai Shangzhou people to our  
737 core model in **Figure 6** and then fitted all Tibetans on it. We found that Yunnan Kham Tibetan harbored  
738 33% additional ancestry associated with Longshan people, Sichuan Yajiang Kham Tibetan with 26%  
739 additional Longshan-related ancestry population (**Figure 9**). It is interesting to found that the gene pool  
740 of the Lhasa Ü-Tsang Tibetan was also influenced by the second population migration associated with  
741 Longshan people. This second gene flow event persisted when we substituted Longshan People as other  
742 Neolithic or Bronze/Iron Age populations with the acceptable ancestry proportions (**Figures S105–107**),  
743 these phenomena may be caused by genetic stability of the main ancestry in Central Plain (Henan and  
744 Shandong provinces).

## 745 Discussion

746 Prehistoric human activities and the origin of the high-altitude adaptive modern Tibetans are the research  
747 topic in a variety of disciplines, mainly including genetics, archaeology, anthropology, history, and  
748 literature. Recent genome-wide sequencing and Paleo-genomic researches have been revolutionizing the  
749 knowledge of peopling of Europe(Narasimhan, et al. 2019), Central/South Asia(Narasimhan, et al. 2019),  
750 America(Nakatsuka, et al. 2020), Africa(Skoglund, et al. 2017) and Oceania(Lipson, Skoglund, et al.  
751 2018). More and more ancient DNA studies from the surrounding of East Asia have been conducted and  
752 reported the population dynamics in Southeast Asia(Lipson, Cheronet, et al. 2018; McColl, et al. 2018)  
753 and South Siberia or Eurasia's Eastern Steppe(Lazaridis, et al. 2014; Raghavan, et al. 2014; Mathieson,  
754 et al. 2015; Damgaard, et al. 2018; Sikora, et al. 2019), but lack in China. Fortunately, six ancient DNA  
755 studies from China(Yang, et al. 2017; Ning, et al. 2019; Ning, et al. 2020; Wang, Yeh, et al. 2020; Yang,  
756 et al. 2020) have been recently published to elucidate the prehistory of East Asian independently with  
757 161 Paleolithic to historic (ranging from 40,000 ybp to 300 ybp). Yang et al. sequenced 40,000-year-old  
758 Tianyuan people from Beijing and found the early Asian population structures existed before the  
759 divergence between East Asian and Native American and the peopling of America by anatomically  
760 modern human populations(Yang, et al. 2017). Yang and Fu et al. recently conducted another ancient  
761 DNA work focused on 24 ancient genomes from Neolithic northern East Asia (eight samples), Neolithic  
762 southern East Asia (fifteen samples) and one historic Chuanyun people and found the north-south genetic  
763 differentiation among East Asian persisted since the early Neolithic period due to the observed significant  
764 genetic differences between Neolithic Shandong people and Fujian people based on multiple statistical  
765 methods(Yang, et al. 2020). Besides, they also identified southward migration from Shandong Houli  
766 populations and northward migration from Fujian Tanshishan populations, as well as a Neolithic coastal  
767 connection from southeastern Vietnam to Russia Far East, and a Pro-Austronesian connection between  
768 southern East Asians and southeast Pacific Vanuatu islanders. Besides, Ning et al. reported the population  
769

770 history of North China with fifteen ancient genomes from the Yellow River, West Liao River and Amur  
771 River, and discovered the subsistence strategy changes were associated with the population movements  
772 and admixtures(Ning, et al. 2020). Ning and Wang et.al. also reported ten Iron Age Shirenzigou people  
773 and found the Yamnaya-related steppe pastoralists mediated the population communications between  
774 East Asian and western Eurasian and dispersed Indo-European language into the Northwest China(Wang,  
775 Yeh, et al. 2020). Although these progresses have been achieved, the population history, genetic  
776 relationship and genetic differentiation between highland and lowland modern and ancient East Asians  
777 still kept in its infancy and remained to be clarified. Thus, we collected nineteen TP-related Neolithic to  
778 historic ancients, seventy-eight modern Tibetans from Ü-Tsang, Ando and Kham Tibetan regions, as well  
779 as all available eastern Eurasian ancients with different prehistoric human cultural backgrounds  
780 (including Tanshishan culture: Tanshishan and Xitoucun; Houli culture: Xiaogao, Xiaojingshan,  
781 Bianbian, and Boshan; Yangshao culture: Wanggou and Xiaowu; Longshan culture: Pingliangtai,  
782 Haojiatai, and Wadian; Hongshan culture: Banlashan) as well as modern Eurasians from Indo-European,  
783 Altai, Uralic, Sino-Tibetan, Austronesian, Austroasiatic, Hmong-Mien and Tai-Kadai language families  
784 and conducted one comprehensive Paleolithic to present-day ancient and modern genomic meta-analysis  
785 to provide new insights into the peopling of TP and clarify the relationship between high-altitude adaptive  
786 modern and ancients and lowland modern and ancient East Asians.

787  
788 Modern and ancient genomes from TP showed a clear connection with northern modern Han Chinese  
789 and Neolithic northern East Asians (especially with coastal Houli people from Shandong, inland  
790 Yangshao and Longshan people from Henan and Qijia people from Ganqing region), which suggested  
791 the northern China-origin of modern Tibeto-Burman speaking populations. Three hypotheses have been  
792 proposed to elucidate the origin of the Sino-Tibetan language family based on the linguistic diversity and  
793 others(Zhang, et al. 2019), including northern China-origin associated with Yangshao/Majiyao  
794 hypothesis, southwestern Sichuan-origin hypothesis, and northeastern India-origin hypothesis. Based on  
795 the farming/language dispersal hypothesis, and the similarities of material culture assemblage among TP,  
796 East Asia, South/Central Asia, and Siberia, the origin of modern and ancient Tibetans is still confused  
797 and unclear(Jeong, et al. 2016). Shared ancestry revealed by our PCA, pairwise  $F_{st}$  genetic distance and  
798 outgroup- $f_3$  values, ADMIXTURE, and  $f_4$ -statistics among modern and ancient highlanders and northern  
799 East Asian lowlanders showed their close relationship among them, which is consistent with genetic  
800 similarities revealed by forensic low-density genetic markers and uniparental haplotype/haplogroup  
801 data(Zou, et al. 2018; Chen, Wu, et al. 2019; He, et al. 2019). Direct evidence supported and confirmed  
802 this proposed common origin of Sino-Tibetan (northern China-origin associated with  
803 Yangshao/Majiyao hypothesis) was provided by the phylogenetic relationship reconstruction. Both  
804 TreeMix and qpGraph based on phylogenetic results supported the main ancestry in modern Tibetans,  
805 ancient TP people (Nepal and Qijia ancients) were derived from the common northern East Asian lineage  
806 related to East Mongolia Neolithic people and Yangshao/Longshan/Houli people from Central Plain.  
807 Thus, our results in this meta-genomic analysis supported the main lineage of TP people was originated  
808 from the lower and middle Yellow River with the Neolithic expansion of millet farmer. Our Neolithic to  
809 present-day autosomal genome-based findings confirmed the origin, diversification, and expansion of  
810 the modern Sino-Tibetan population revealed by mitochondrial and Y-chromosome variations(Wang, Lu,  
811 et al. 2018; Li, Tian, et al. 2019b).

812  
813 Although strong evidence for the common origin of Sino-Tibetan speakers was provided, we still  
814 identified the differences in their ancestry composition. Compared with the Highlanders in TP, lowland  
815 late Neolithic to present-day harbored more ancestry related to Neolithic southern East Asians and  
816 Siberians. Iron Age Dacaozi people from Ganqing Region also showed a closer genetic affinity with  
817 southern people from Tanshishan culture, which showed the genetic trace of the northward dispersal of  
818 rice farmers. Compared with lowland Yangshao/Longshan or coastal Houli populations, the highland  
819 populations harbored a certain (8%~14%) proportion of Paleolithic Hunter-Gatherer ancestry related to  
820 Onge or Hoabinhian populations. Thus, our meta-analysis provided new evidence for the co-existence of  
821 both Paleolithic ancestries and Neolithic ancestries in the gene pool of East Asian Highlanders and a  
822 paleolithic colonization and Neolithic expansion of TP people, which was previously clarified via modern  
823 whole-sequence and mitochondrial and Y-chromosomal data(Qi, et al. 2013; Wang, Lu, et al. 2018; Li,  
824 Tian, et al. 2019b). Additionally, we also found obvious population substructures among modern Tibetans:  
825 Ü-Tsang Tibetans in Tibet core region having predominant original Paleolithic and Neolithic ancestries,  
826 Ando Tibetans from Ganqing region in northwest China owing 2~3% western Eurasian admixture  
827 ancestry via qpGraph-based model and Kham Tibetans from Sichuan and Yunnan provinces possessing  
828 stronger southern Neolithic East Asian affinity. Thus, population substructures observed in modern  
829 Tibetan were consistent with the geographic and cultural divisions, which suggested that the complex

830 cultural backgrounds and terrain to some extent served as the barriers for population movement and  
831 admixture. The second wave of population movements and admixtures well fitted in our qpGraph-based  
832 phylogeny revealed the gene flow from southern Iron Age East Asians to Kham Tibetans, from Neolithic  
833 northern East Asians to Kham and Ü-Tsang Tibetans, from western Eurasians to Ando Tibetans, which  
834 demonstrated multiple waves from Siberia, northern and southern East Asia have shaped the gene pool  
835 of East Asian highlander of Tibetan.

836

### 837 **Conclusion**

838 Our comprehensive Neolithic to present-day genomic meta-analysis focused on eastern Eurasian  
839 (especially for China) was performed to clarify the relationships between Highlanders from TP and  
840 lowland East Asians and explore the peopling of TP for the first time. Results from our genetic survey  
841 showed a strong genetic affinity between ancient-modern Tibetans and Neolithic to present-day northern  
842 East Asian, which suggested that the main lineage of Tibeto-Burman speakers originated from  
843 Yangshao/Longshan people in the middle and lower Yellow River basin in North China with the common  
844 ancestor of Han Chinese and the dispersal of millet farmers and Sino-Tibetan languages. Although the  
845 shared ancestry persisted among ancient Tibetans and lowland Yangshao/Longshan/Houli people, we  
846 also found genetic differentiation among them: Highland Tibetans harboring deeply diverged eastern  
847 Eurasian Onge-related Hunter-Gatherer ancestry and lowland Neolithic to present-day northern East  
848 Asians possessing more ancestry from Neolithic southern East Asian and Siberian ancestries, suggesting  
849 co-existence of Paleolithic and Neolithic ancestries in modern and ancient Tibetans and the population  
850 history of paleolithic colonization and Neolithic expansion. Besides, consistent with the  
851 geographic/linguistic divisions, three population substructures were identified in modern Tibetans:  
852 higher Onge/Hoabinhian ancestry in Ü-Tsang Tibetans, more western Eurasian-related ancestry in Ando  
853 Tibetans, and greater Neolithic southern East Asian ancestry in Kham Tibetan. Summarily, modern East  
854 Asian Highlanders derived ancestry from at least five ancient populations: Hoabinhian as the oldest layer;  
855 additional genetic materials from two Neolithic expansions (inland and coastal) from Northern East  
856 Asians, one Neolithic southern East Asian northwestward expansion and one western Eurasian eastward  
857 expansion.

858

### 859 **Methods and Materials**

#### 860 **Public dataset available**

861 We collected 2,444 individuals from 183 geographically/culturally different populations(Patterson, et al.  
862 2012; Lipson, Cheronet, et al. 2018; Jeong, et al. 2019; Liu, et al. 2020) belonging to fifteen language  
863 families or groups: Sinitic, Tai-Kadai, Tibeto-Burman, Tungusic, Turkic, Uralic, Austroasiatic,  
864 Austronesian, Caucasian, Chukotko-Kamchatkan, Eskimo-Aleut, Hmong-Mien, Indo-European, Japonic,  
865 Koreanic and Mongolic. 383 modern East Asians genotyped via Affymetrix Human Origins array  
866 (including 98 high-altitude adaptive Tibetans) by our group also used here(Wang, Yeh, et al. 2020).  
867 Besides, Paleolithic to historic ancient genomes from East Eurasian (Russia, China, Mongolia, Nepal  
868 and countries from Southeast Asia) were collected from recent ancient DNA studies or Reich Lab. A total  
869 of 161 Paleolithic to historic East Asians and eight Nepal ancients were collected and first  
870 comprehensively meta-analyzed and discussed in the present study(Jeong, et al. 2016; Yang, et al. 2017;  
871 Ning, et al. 2020; Wang, Yeh, et al. 2020; Yang, et al. 2020).

#### 872 **Principal component analysis**

873 We performed principal component analysis (PCA) with the *smartpca* program of the EIGENSOFT  
874 package(Patterson, et al. 2006), using default parameters and the `lsqproject: YES` and `numoutlieriter: 0`  
875 options to project ancient samples onto the first two components.

#### 876 **ADMIXTURE analysis**

877 We carried out model-based clustering analysis using the ADMIXTURE (v.1.3.0)(Alexander, et al. 2009)  
878 after pruning for linkage disequilibrium in PLINK v.1.9(Chang, et al. 2015) with parameters `--indep-`  
879 `pairwise 200 25 0.4`. We ran ADMIXTURE with the 10-fold cross-validation (`--cv = 10`), predefining the  
880 number of ancestral populations between  $K = 2$  and  $K = 20$  in 100 bootstraps with different random seeds.

#### 881 **F-statistics**

882 We computed  $f_3$ - and  $f_4$ -statistics using the *qp3Pop* and *qpDstat* programs as implemented in the  
883 ADMIXTOOLS(Reich, et al. 2009; Patterson, et al. 2012) with default parameters. We assessed standard  
884 errors using the weighted block jackknife approach.

#### 885 **Admixture graph modeling**

886 We ran TreeMix v.1.13(Pickrell and Pritchard 2012) with migration events ranging from 0 to 8 to  
887 construct the topology with the maximum likelihood. Based on the results of the *f*-statistics, we carried  
888 out graph-based admixture modeling using the *qpGraph* program as implemented in the ADMIXTOOLS  
889 package using Mbuti as an outgroup(Fu, et al. 2015).

890 **Streams of ancestry and inference of mixture proportions**

891 We used the *qpWave* and *qpAdm* as implemented in the ADMIXTOOLS(Haak, et al. 2015) to estimate  
892 mixture proportions with respect to a basic set of outgroup populations: Mbuti, Ust\_Ishim,  
893 Russia\_Kostenki14, Papuan, Australian, Mixe, MA1 and Mongolia\_N\_East

894

895 **Acknowledgements**

896 This study was supported by the National Natural Science Foundation of China (31801040 and  
897 31760309), Nanqiang Outstanding Young Talents Program of Xiamen University (X2123302),  
898 Fundamental Research Funds for the Central Universities (ZK1144), and Lanzhou Talent Innovation and  
899 Entrepreneurship Project (2018-RC-113).

900

901 **Disclosure of potential conflict of interest**

902 The author declares no conflict of interest.

903

904

905 **Reference**

906 Aldenderfer M. 2011. Peopling the Tibetan plateau: insights from archaeology. *High Altitude Medicine*  
907 *& Biology* 12:141-147.

908 Alexander DH, Novembre J, Lange K. 2009. Fast model-based estimation of ancestry in unrelated  
909 individuals. *Genome Research* 19:1655-1664.

910 Allentoft ME, Sikora M, Sjogren KG, Rasmussen S, Rasmussen M, Stenderup J, Damgaard PB,  
911 Schroeder H, Ahlstrom T, Vinner L, et al. 2015. Population genomics of Bronze Age Eurasia. *Nature*  
912 522:167-172.

913 Chang CC, Chow CC, Tellier LC, Vattikuti S, Purcell SM, Lee JJ. 2015. Second-generation PLINK:  
914 rising to the challenge of larger and richer datasets. *Gigascience* 4:7.

915 Chen F, Welker F, Shen CC, Bailey SE, Bergmann I, Davis S, Xia H, Wang H, Fischer R, Freidline SE,  
916 et al. 2019. A late Middle Pleistocene Denisovan mandible from the Tibetan Plateau. *Nature* 569:409-  
917 412.

918 Chen FH, Dong GH, Zhang DJ, Liu XY, Jia X, An C-B, Ma MM, Xie YW, Barton L, Ren X. 2015.  
919 Agriculture facilitated permanent human occupation of the Tibetan Plateau after 3600 BP. *Science*  
920 347:248-250.

921 Chen P, Wu J, Luo L, Gao H, Wang M, Zou X, Li Y, Chen G, Luo H, Yu L, et al. 2019. Population Genetic  
922 Analysis of Modern and Ancient DNA Variations Yields New Insights Into the Formation, Genetic  
923 Structure, and Phylogenetic Relationship of Northern Han Chinese. *Front Genet* 10:1045.

924 d'Alpoim Guedes J. 2015. Rethinking the spread of agriculture to the Tibetan Plateau. *The Holocene*  
925 25:1498-1510.

926 Damgaard PB, Marchi N, Rasmussen S, Peyrot M, Renaud G, Korneliussen T, Moreno-Mayar JV,  
927 Pedersen MW, Goldberg A, Usmanova E, et al. 2018. 137 ancient human genomes from across the  
928 Eurasian steppes. *Nature* 557:369-374.

929 de Barros Damgaard P, Martiniano R, Kamm J, Moreno-Mayar JV, Kroonen G, Peyrot M, Barjamovic  
930 G, Rasmussen S, Zacho C, Baimukhanov N, et al. 2018. The first horse herders and the impact of early  
931 Bronze Age steppe expansions into Asia. *Science* 360:eaar7711.

932 Deng L, Zhang C, Yuan K, Gao Y, Pan YW, Ge XL, He YX, Yuan Y, Lu Y, Zhang XX, et al. 2019.  
933 Prioritizing natural-selection signals from the deep-sequencing genomic data suggests multi-variant  
934 adaptation in Tibetan highlanders. *National Science Review* 6:1201-1222.

935 Fu Q, Hajdinjak M, Moldovan OT, Constantin S, Mallick S, Skoglund P, Patterson N, Rohland N,  
936 Lazaridis I, Nickel B, et al. 2015. An early modern human from Romania with a recent Neanderthal  
937 ancestor. *Nature* 524:216-219.

938 Gao JY, Hou GL, Wei HC, Chen YC, E CY, Chen XL, Lancuo Z. 2020. Prehistoric human activity and  
939 its environmental background in Lake Donggi Cona basin, northeastern Tibetan Plateau. *Holocene*  
940 30:657-671.

941 Gnecci-Ruscone GA, Abondio P, De Fanti S, Sarno S, Sherpa MG, Sherpa PT, Marinelli G, Natali L,  
942 Di Marcello M, Peluzzi D, et al. 2018. Evidence of Polygenic Adaptation to High Altitude from Tibetan  
943 and Sherpa Genomes. *Genome Biol Evol* 10:2919-2930.

944 Haak W, Lazaridis I, Patterson N, Rohland N, Mallick S, Llamas B, Brandt G, Nordenfelt S, Harney E,  
945 Stewardson K, et al. 2015. Massive migration from the steppe was a source for Indo-European languages  
946 in Europe. *Nature* 522:207-211.

947 He G, Wang Z, Su Y, Zou X, Wang M, Chen X, Gao B, Liu J, Wang S, Hou Y. 2019. Genetic structure  
948 and forensic characteristics of Tibeto-Burman-speaking U-Tsang and Kham Tibetan Highlanders

- 949 revealed by 27 Y-chromosomal STRs. *Sci Rep* 9:7739.
- 950 He G, Wang Z, Su Y, Zou X, Wang M, Liu J, Hou Y. 2018. Genetic variation and forensic characterization  
951 of highland Tibetan ethnicity revealed by autosomal STR markers. *International Journal of Legal*  
952 *Medicine* 132:1097-1102.
- 953 He G, Wang Z, Zou X, Chen X, Liu J, Wang M, Hou Y. 2018. Genetic diversity and phylogenetic  
954 characteristics of Chinese Tibetan and Yi minority ethnic groups revealed by non-CODIS STR markers.  
955 *Scientific Reports* 8:5895.
- 956 Hu XJ, Yang J, Xie XL, Lv FH, Cao YH, Li WR, Liu MJ, Wang YT, Li JQ, Liu YG, et al. 2019. The  
957 Genome Landscape of Tibetan Sheep Reveals Adaptive Introgression from Argali and the History of  
958 Early Human Settlements on the Qinghai-Tibetan Plateau. *Molecular Biology and Evolution* 36:283-303.
- 959 Huerta-Sanchez E, Jin X, Asan, Bianba Z, Peter BM, Vinckenbosch N, Liang Y, Yi X, He M, Somel M,  
960 et al. 2014. Altitude adaptation in Tibetans caused by introgression of Denisovan-like DNA. *Nature*  
961 512:194-197.
- 962 Jeong C, Balanovsky O, Lukianova E, Kahbatkyzy N, Flegontov P, Zaporozhchenko V, Immel A, Wang  
963 CC, Ixan O, Khussainova E, et al. 2019. The genetic history of admixture across inner Eurasia. *Nat Ecol*  
964 *Evol* 3:966-976.
- 965 Jeong C, Ozga AT, Witonsky DB, Malmstrom H, Edlund H, Hofman CA, Hagan RW, Jakobsson M,  
966 Lewis CM, Aldenderfer MS, et al. 2016. Long-term genetic stability and a high-altitude East Asian origin  
967 for the peoples of the high valleys of the Himalayan arc. *Proceedings of the National Academy of*  
968 *Sciences of the United States of America* 113:7485-7490.
- 969 Jeong C, Wang K, Wilkin S, Taylor WTT, Miller BK, Ulziibayar S, Stahl R, Chiovelli C, Bemmann JH,  
970 Knolle F, et al. 2020. A dynamic 6,000-year genetic history of Eurasia's Eastern Steppe.
- 971 Lazaridis I, Patterson N, Mitnik A, Renaud G, Mallick S, Kirsanow K, Sudmant PH, Schraiber JG,  
972 Castellano S, Lipson M, et al. 2014. Ancient human genomes suggest three ancestral populations for  
973 present-day Europeans. *Nature* 513:409-413.
- 974 Li L, Ye Y, Song F, Wang Z, Hou Y. 2019. Genetic structure and forensic parameters of 30 InDels for  
975 human identification purposes in 10 Tibetan populations of China. *Forensic Sci Int Genet* 40:e219-e227.
- 976 Li Y-C, Tian J-Y, Liu F-W, Yang B-Y, Gu K-S-Y, Rahman ZU, Yang L-Q, Chen F-H, Dong G-H, Kong  
977 Q-P. 2019a. Neolithic millet farmers contributed to the permanent settlement of the Tibetan Plateau by  
978 adopting barley agriculture. *National Science Review* 6:1005-1013.
- 979 Li YC, Tian JY, Kong QP. 2015. A dual origin of Tibetans: evidence from mitochondrial genomes. *Journal*  
980 *of Human Genetics* 60:403-404.
- 981 Li YC, Tian JY, Liu FW, Yang BY, Gu KSY, Rahman ZU, Yang LQ, Chen FH, Dong GH, Kong QP.  
982 2019b. Neolithic millet farmers contributed to the permanent settlement of the Tibetan Plateau by  
983 adopting barley agriculture. *National Science Review* 6:1005-1013.
- 984 Lipson M, Cheronet O, Mallick S, Rohland N, Oxenham M, Pietrusewsky M, Pryce TO, Willis A,  
985 Matsumura H, Buckley H, et al. 2018. Ancient genomes document multiple waves of migration in  
986 Southeast Asian prehistory. *Science* 361:92-95.
- 987 Lipson M, Skoglund P, Spriggs M, Valentin F, Bedford S, Shing R, Buckley H, Phillip I, Ward GK,  
988 Mallick S, et al. 2018. Population Turnover in Remote Oceania Shortly after Initial Settlement. *Curr Biol*  
989 28:1157-1165 e1157.
- 990 Liu D, Duong NT, Ton ND, Van Phong N, Pakendorf B, Van Hai N, Stoneking M. 2020. Extensive  
991 ethnolinguistic diversity in Vietnam reflects multiple sources of genetic diversity. *Mol Biol Evol*.
- 992 Lu D, Lou H, Yuan K, Wang X, Wang Y, Zhang C, Lu Y, Yang X, Deng L, Zhou Y, et al. 2016. Ancestral



- 993 Origins and Genetic History of Tibetan Highlanders. *American Journal of Human Genetics* 99:580-594.  
994 Lu H. 2016. Colonization of the Tibetan Plateau, permanent settlement, and the spread of agriculture:  
995 Reflection on current debates on the prehistoric archeology of the Tibetan Plateau. *Archaeological*  
996 *Research in Asia* 5:12-15.
- 997 Mathieson I, Lazaridis I, Rohland N, Mallick S, Patterson N, Roodenberg SA, Harney E, Stewardson K,  
998 Fernandes D, Novak M, et al. 2015. Genome-wide patterns of selection in 230 ancient Eurasians. *Nature*  
999 528:499-503.
- 1000 McColl H, Racimo F, Vinner L, Demeter F, Gakuhari T, Moreno-Mayar JV, van Driem G, Gram Wilken  
1001 U, Seguin-Orlando A, de la Fuente Castro C, et al. 2018. The prehistoric peopling of Southeast Asia.  
1002 *Science* 361:88-92.
- 1003 Meyer MC, Aldenderfer MS, Wang Z, Hoffmann DL, Dahl JA, Degering D, Haas WR, Schlutz F. 2017.  
1004 Permanent human occupation of the central Tibetan Plateau in the early Holocene. *Science* 355:64-67.
- 1005 Nakatsuka N, Lazaridis I, Barbieri C, Skoglund P, Rohland N, Mallick S, Posth C, Harkins-Kinkaid K,  
1006 Ferry M, Harney E, et al. 2020. A Paleogenomic Reconstruction of the Deep Population History of the  
1007 Andes. *Cell* 181:1131-1145 e1121.
- 1008 Narasimhan VM, Patterson N, Moorjani P, Rohland N, Bernardos R, Mallick S, Lazaridis I, Nakatsuka  
1009 N, Olalde I, Lipson M, et al. 2019. The formation of human populations in South and Central Asia.  
1010 *Science* 365:eaat7487.
- 1011 Ning C, Li T, Wang K, Zhang F, Li T, Wu X, Gao S, Zhang Q, Zhang H, Hudson MJ, et al. 2020. Ancient  
1012 genomes from northern China suggest links between subsistence changes and human migration. *Nat*  
1013 *Commun* 11:2700.
- 1014 Ning C, Wang CC, Gao S, Yang Y, Zhang X, Wu X, Zhang F, Nie Z, Tang Y, Robbeets M, et al. 2019.  
1015 Ancient Genomes Reveal Yamnaya-Related Ancestry and a Potential Source of Indo-European Speakers  
1016 in Iron Age Tianshan. *Curr Biol* 29:2526-2532 e2524.
- 1017 Patterson N, Moorjani P, Luo Y, Mallick S, Rohland N, Zhan Y, Genschoreck T, Webster T, Reich D.  
1018 2012. Ancient admixture in human history. *Genetics* 192:1065-1093.
- 1019 Patterson N, Price AL, Reich D. 2006. Population structure and eigenanalysis. *PLoS Genetics* 2:e190.
- 1020 Pickrell JK, Pritchard JK. 2012. Inference of population splits and mixtures from genome-wide allele  
1021 frequency data. *PLoS Genet* 8:e1002967.
- 1022 Qi X, Cui C, Peng Y, Zhang X, Yang Z, Zhong H, Zhang H, Xiang K, Cao X, Wang Y, et al. 2013. Genetic  
1023 evidence of paleolithic colonization and neolithic expansion of modern humans on the tibetan plateau.  
1024 *Molecular Biology and Evolution* 30:1761-1778.
- 1025 Qin Z, Yang Y, Kang L, Yan S, Cho K, Cai X, Lu Y, Zheng H, Zhu D, Fei D, et al. 2010. A mitochondrial  
1026 revelation of early human migrations to the Tibetan Plateau before and after the last glacial maximum.  
1027 *Am J Phys Anthropol* 143:555-569.
- 1028 Raghavan M, Skoglund P, Graf KE, Metspalu M, Albrechtsen A, Moltke I, Rasmussen S, Stafford TW,  
1029 Jr., Orlando L, Metspalu E, et al. 2014. Upper Palaeolithic Siberian genome reveals dual ancestry of  
1030 Native Americans. *Nature* 505:87-91.
- 1031 Reich D. 2018. *Who we are and how we got here: Ancient DNA and the new science of the human past*:  
1032 Oxford University Press.
- 1033 Reich D, Thangaraj K, Patterson N, Price AL, Singh L. 2009. Reconstructing Indian population history.  
1034 *Nature* 461:489-494.
- 1035 Ren L, Dong G, Liu F, d'Alpoim-Guedes J, Flad RK, Ma M, Li H, Yang Y, Liu Y, Zhang D, et al. 2020.  
1036 Foraging and farming: archaeobotanical and zooarchaeological evidence for Neolithic exchange on the

- 1037 Tibetan Plateau. *Antiquity*:1-16.
- 1038 Rhode D. 2016. A biogeographic perspective on early human colonization of the Tibetan Plateau.
- 1039 *Archaeological Research in Asia* 5:33-43.
- 1040 Shi H, Zhong H, Peng Y, Dong YL, Qi XB, Zhang F, Liu LF, Tan SJ, Ma RZ, Xiao CJ, et al. 2008. Y
- 1041 chromosome evidence of earliest modern human settlement in East Asia and multiple origins of Tibetan
- 1042 and Japanese populations. *BMC Biol* 6:45.
- 1043 Sikora M, Pitulko VV, Sousa VC, Allentoft ME, Vinner L, Rasmussen S, Margaryan A, de Barros
- 1044 Damgaard P, de la Fuente C, Renaud G, et al. 2019. The population history of northeastern Siberia since
- 1045 the Pleistocene. *Nature* 570:182-188.
- 1046 Simonson TS, Yang Y, Huff CD, Yun H, Qin G, Witherspoon DJ, Bai Z, Lorenzo FR, Xing J, Jorde LB,
- 1047 et al. 2010. Genetic evidence for high-altitude adaptation in Tibet. *Science* 329:72-75.
- 1048 Skoglund P, Thompson JC, Prendergast ME, Mitnik A, Sirak K, Hajdinjak M, Salie T, Rohland N,
- 1049 Mallick S, Peltzer A, et al. 2017. Reconstructing Prehistoric African Population Structure. *Cell* 171:59-
- 1050 71 e21.
- 1051 Wang C-C, Yeh H-Y, Popov AN, Zhang H-Q, Matsumura H, Sirak K, Cheronet O, Kovalev A, Rohland
- 1052 N, Kim AM, et al. 2020. The Genomic Formation of Human Populations in East
- 1053 Asia.2020.2003.2025.004606.
- 1054 Wang LX, Lu Y, Zhang C, Wei LH, Yan S, Huang YZ, Wang CC, Mallick S, Wen SQ, Jin L, et al. 2018.
- 1055 Reconstruction of Y-chromosome phylogeny reveals two neolithic expansions of Tibeto-Burman
- 1056 populations. *Mol Genet Genomics* 293:1293-1300.
- 1057 Wang M, Du W, He G, Wang S, Zou X, Liu J, Liu C, Liu C, Wang Z. 2020. Revisiting the genetic
- 1058 background and phylogenetic structure of five Sino-Tibetan-speaking populations: insights from
- 1059 autosomal InDels. *Mol Genet Genomics* 295:969-979.
- 1060 Wang M, Wang Z, He G, Wang S, Zou X, Liu J, Wang F, Ye Z, Hou Y. 2020. Whole mitochondrial
- 1061 genome analysis of highland Tibetan ethnicity using massively parallel sequencing. *Forensic Sci Int*
- 1062 *Genet* 44:102197.
- 1063 Wang Z, He G, Luo T, Zhao X, Liu J, Wang M, Zhou D, Chen X, Li C, Hou Y. 2018. Massively parallel
- 1064 sequencing of 165 ancestry informative SNPs in two Chinese Tibetan-Burmese minority ethnicities.
- 1065 *Forensic Sci Int Genet* 34:141-147.
- 1066 Xiang K, Ouzhuluobu, Peng Y, Yang Z, Zhang X, Cui C, Zhang H, Li M, Zhang Y, Bianba, et al. 2013.
- 1067 Identification of a Tibetan-specific mutation in the hypoxic gene EGLN1 and its contribution to high-
- 1068 altitude adaptation. *Molecular Biology and Evolution* 30:1889-1898.
- 1069 Xu S, Li S, Yang Y, Tan J, Lou H, Jin W, Yang L, Pan X, Wang J, Shen Y, et al. 2011. A genome-wide
- 1070 search for signals of high-altitude adaptation in Tibetans. *Molecular Biology and Evolution* 28:1003-
- 1071 1011.
- 1072 Yang MA, Fan X, Sun B, Chen C, Lang J, Ko YC, Tsang CH, Chiu H, Wang T, Bao Q, et al. 2020.
- 1073 Ancient DNA indicates human population shifts and admixture in northern and southern China. *Science*.
- 1074 Yang MA, Gao X, Theunert C, Tong H, Aximu-Petri A, Nickel B, Slatkin M, Meyer M, Paabo S, Kelso
- 1075 J, et al. 2017. 40,000-Year-Old Individual from Asia Provides Insight into Early Population Structure in
- 1076 Eurasia. *Curr Biol* 27:3202-3208 e3209.
- 1077 Zhang DD, Li SH. 2002. Optical dating of Tibetan human hand- and footprints: An implication for the
- 1078 palaeoenvironment of the last glaciation of the Tibetan Plateau. *Geophysical Research Letters* 29:16-11-
- 1079 16-13.
- 1080 Zhang M, Yan S, Pan W, Jin L. 2019. Phylogenetic evidence for Sino-Tibetan origin in northern China

1081 in the Late Neolithic. *Nature* 569:112-115.  
1082 Zhang XL, B.Ha B, Wang SJ, Chen ZJ, Y.Ge J, Long H, W.He, Da W, Nian XM, M.J.Yi, et al. 2018. The  
1083 earliest human occupation of the high-altitude Tibetan Plateau 40 thousand to 30 thousand years ago.  
1084 *Science*.  
1085 Zhao M, Kong QP, Wang HW, Peng MS, Xie XD, Wang WZ, Jiayang, Duan JG, Cai MC, Zhao SN, et  
1086 al. 2009. Mitochondrial genome evidence reveals successful Late Paleolithic settlement on the Tibetan  
1087 Plateau. *Proceedings of the National Academy of Sciences of the United States of America* 106:21230-  
1088 21235.  
1089 Zou X, He G, Wang M, Huo L, Chen X, Liu J, Wang S, Ye Z, Wang F, Wang Z, et al. 2020. Genetic  
1090 diversity and phylogenetic structure of four Tibeto-Burman-speaking populations in Tibetan-Yi corridor  
1091 revealed by insertion/deletion polymorphisms. *Mol Genet Genomic Med* 8:e1140.  
1092 Zou X, Wang Z, He G, Wang M, Su Y, Liu J, Chen P, Wang S, Gao B, Li Z, et al. 2018. Population  
1093 Genetic Diversity and Phylogenetic Characteristics for High-Altitude Adaptive Kham Tibetan Revealed  
1094 by DNATyper(TM) 19 Amplification System. *Front Genet* 9:630.  
1095  
1096

1097 **Legends of Tables**

- 1098 Table S1. Pairwise Fst genetic distance between eleven modern Tibetans and other 71 worldwide  
1099 reference populations.
- 1100 Table S2. Pairwise Fst genetic distance between eleven modern Tibetans, Yoruba and other 20 East Asian  
1101 Neolithic to Bronze/Iron Age reference populations.
- 1102 Table S3. The results of outgroup-f3(Modern Tibetans/other 278 Eurasian modern and Ancient  
1103 population, Modern Tibetans/other 278 Eurasian modern and Ancient population; Mbuti)
- 1104 Table S4. Admixture-f3-statistics of the form f3(Source population1, Source population2; Shigatse  
1105 Tibetan) showed the admixture signals for high-altitude adaptive Shigatse Tibetan
- 1106 Table S5. Admixture-f3-statistics of the form f3(Source population1, Source population2; Shannan  
1107 Tibetan) showed the admixture signals for high-altitude adaptive Shannan Tibetan
- 1108 Table S6. Admixture-f3-statistics of the form f3(Source population1, Source population2; Lhasa Tibetan)  
1109 showed the admixture signals for high-altitude adaptive Lhasa Tibetan
- 1110 Table S7. Admixture-f3-statistics of the form f3(Source population1, Source population2; Nagqu Tibetan)  
1111 showed the admixture signals for high-altitude adaptive Nagqu Tibetan
- 1112 Table S8. Admixture-f3-statistics of the form f3(Source population1, Source population2; Chamdo  
1113 Tibetan) showed the admixture signals for high-altitude adaptive Chamdo Tibetan
- 1114 Table S9. Admixture-f3-statistics of the form f3(Source population1, Source population2; Gannan  
1115 Tibetan) showed the admixture signals for lowland Gannan Tibetan from Gansu province
- 1116 Table S10. Admixture-f3-statistics of the form f3(Source population1, Source population2; Gangcha  
1117 Tibetan) showed the admixture signals for lowland Gangcha Tibetan from Qinghai province
- 1118 Table S11. Admixture-f3-statistics of the form f3(Source population1, Source population2; Xunhua  
1119 Tibetan) showed the admixture signals for lowland Xunhua Tibetan from Qinghai province
- 1120 Table S12. Admixture-f3-statistics of the form f3(Source population1, Source population2; Xinlong  
1121 Tibetan) showed the admixture signals for lowland Xinlong Tibetan from Sichuan province
- 1122 Table S13. Admixture-f3-statistics of the form f3(Source population1, Source population2; Yajiang  
1123 Tibetan) showed the admixture signals for lowland Yajiang Tibetan from Sichuan province
- 1124 Table S14. Admixture-f3-statistics of the form f3(Source population1, Source population2; Yunnan  
1125 Tibetan) showed the admixture signals for lowland Yunnan Tibetan
- 1126 Table S15. Admixture-f3-statistics of the form f3(Source population1, Source population2;  
1127 Nepal\_Samdzong\_1500BP) showed the admixture signals for high-altitude adaptive 1500-year-old  
1128 Samdzong population from Nepal
- 1129 Table S16. Admixture-f3-statistics of the form f3(Source population1, Source population2;  
1130 Nepal\_Mebrak\_2125BP) showed the admixture signals for high-altitude adaptive 2125-year-old Mebrak  
1131 population from Nepal
- 1132 Table S17. Admixture-f3-statistics of the form f3(Source population1, Source population2; Lajia\_LN)  
1133 showed the admixture signals for late Neolithic Lajia population from the upper Yellow River Basin
- 1134 Table S18. Admixture-f3-statistics of the form f3(Source population1, Source population2; Dacaozi\_IA)  
1135 showed the admixture signals for Iron Age Dacaozi population from the upper Yellow River Basin
- 1136 Table S19. Results of four population texts focused on the genetic differentiation within Tibetans
- 1137 Table S20. Ancestry composition of two-way admixture Model
- 1138
- 1139
